# Supplementary material for: Chitosanases from Family 46 of Glycoside Hydrolases: From Proteins to Phenotypes
Source: PubMed Central journal article supplement (PMC4663542; doi:10.3390/md13116566), 2015-10-28
Supplement: marinedrugs-13-06566-s001.pdf [file marinedrugs-13-06566-s001.pdf]

# Supplementary Materials

SEC:Signal peptide

TAT signal peptide

>C6WIU3 ACTMD Actinosynnema mirum ATCC 29888 Amir\_4331  
MSRVKPRLAAGAGLSAAAVVGAFLVQPATADGFTGPVVGLGGKCLDVAGASSANGTAV  
QLYTCNGTSAQSWTVDTGAKTIKALGKCLDVDDGRHDGALLQIWDCAVPEQRWTVDTQT  
GRVVGQSGKCVDPAGNTADGTRLQVWTCDAWSPYQRWTPGGGTNPTTTTTSQVPGRS  
DLATPAKKDIAMRLVSSAENSSLDWRAQFAYIEDIGDGRGYTAGIIGFCSGTGDMLELVE  
HYTSVKPNNALAGYLPALRRVNGTPSHEGLDPGFQQAWRTAAQDPVFQQAQETERDRVYF  
TFSVNQAKSDGLRALGQFAYYDAIVMHGGGTDQASFGTIRRKAMARAKTPAQGGDETAYL  
HAFLDERVVMKLEEAHEDTSRVDTAQRVFLNNGNLDLNTPLAWKVYGDPPFRID

>tr|D8I4T1|D8I4T1\_AMYMU Chitosanase OS=Amycolatopsis mediterranei (strain U-32)  
GN=AMED\_6991 PE=4 SV=1  
MSKKLRPVLVGLTGAASVAALVITTPALSSAAPAPLAASSASVLATGDLAPAKKEIAMK  
LVSSAENSSLDWKAQYKYIEDIGDGRGYTAGIIGFCSGTGDMLELVEAYTNSVPNNPLAK  
YLPALRKVNGTASHSLGSAFESAWKQAAATTAFTAQNNERDRVYFNPSVNVQKADGLS  
NLGQFAYYDAIVMHGPGDSSDSFGGIRKAAMKAKTPAQGGDEATYLLKAFFAARKVIMKQ  
EEAHADTSRVDTEQAKFLSEGDFDLHTPLKWKVYGDSYTIIN

>AORI\_1736 Amycolatopsis orientalis HCCB10007  
MSDTLRPAMRRALGAVSVLALAVSGPVAISSLASAAPVPASASIFASGGDLASPEKKEIA  
MQIVSSAENSSLDWKAQYSYIEDIGDGRGYTAGIIGFCSGTGDMLELVERYTNSVDPNPL  
AEYLPALREVDGTESHEGLTGFENAWREAAGREDFKAAQNSERDRVYFDPAVNQAKSDG  
LGALGQFIYYDAIVMHGPGTSSDSFGGIRSAALQQAQPPAQGGDEATYLLKAFLDARRVVM  
KQEEAHADTSRIDTAQLVWLNDGNLHLHTPLKWAVYGDPEYID

>Q9LBG4\_9PSEU Chitosanase OS=Amycolatopsis sp. CsO-2 GN=cho PE=4 SV=1  
MHPSKHRTARTTRTALAVLVGVLPPLTLAAAGTGHAAPAAPAAAASVAVSVGLDDPAKKE  
IAMELVSSAENSSLDWKAQYKYIEDIGDGRGYTAGIIGFCSGTGDMLELVQHYTDLKPGN  
VLAKYLPALKKVNVTDSHSLGSAFVNDWRATAAKDTVFQRAQNDERDRVYFNPAVKQAKA  
ERLRALGQFVYYDAIVMHGPGSSSDSFGGIRAAAMKAKTPAQGGDEATYLLNAFLDARKV  
IMKQEEAHADTSRVDTEQRVFLNAKNFDLNPPLKWKVYGDPEYQING

>E1UPU6\_BACAS Chitosanase OS=Bacillus amyloliquefaciens (strain ATCC 23350 /  
BAMF\_3066  
MRSGLKKKAGFWKKTAVSSLIIFTMFFTLMMSGTVLAAGLNKDQKRRAEQLTSIFENGKTE  
IQGYVEELDDGRGYTCGRAGFTTATGDALEVVEVYTKAVPNNKLLKYLPELRRRLAKDES  
DDTSLNKGFSAWRS LGNDKAFRAAQDEVNDRLYYQPAMKRSQAGLKTALAKAVMYDTV  
IQHGDDPDSFYALIKRTNKKMGSPKDGTDKKNLNFVLDVRYDDLMPNPSDEDTQDEW  
RESVARVDVFRDIVKAKNYNLDPPIHVSSEYGNFTIQ

>tr|Q0PVM7|Q0PVM7\_BACAM Chitosanase OS=Bacillus amyloliquefaciens PE=4 SV=1  
MKAKVDSWKKTAVSLLIIFTMFFTLMMNNTVFAAGLNKDQKRRAEQLTSIFENGMTIQYG  
YVEHLDPGRGYTCGRAGFTTATGDALEVVEVYTKAVPNNKLLKYLPELRRRLAKEESDDIS  
NLKGFDSAWRS LGKDKDFRAAQDTVNDRLYYQPAMKQSDNIGLKTALAKAVMYDTIIQHG  
GGDDPDSLNSLIKRTNKKAGGSPKNGVDEKKNLNFVLDVRYDDLMPNADPDTRDEWRESV  
ARVDVLRSLAKANNYNLNGPINVYSEYGFVVIK

Figure S1. Cont.

>tr|A7Z8H9|A7Z8H9\_BACA2 Csn OS=Bacillus amyloliquefaciens (strain FZB42)  
 GN=RBAM\_029740 PE=4 SV=1  
 MKISLKKKAGFWKKTAVSSLIIFTMFFTLMMMSGTVFAAGLNKDQKRRAEQLTSIFENGKTE  
 IQYGYVEALDDGRGYTCGRAGFTTATGDALEVVEVYTKAVPNNKLLKYLPELRRRLAKDES  
 DDISNLKGFASAWRSLGNDKAFRAAQDKVNDSLYYQPAMERSENAGLKTALAKAVMYDTV  
 IQHGDGDDPDSFYALIKRTNKKMGSSPKDGTDEKKWLNKFLDVRYDDLMPDSEDTEQDEW  
 RESVARVDVFRDIVKEKNYNLNGPIHVRSEYGNFTIQ

>tr|Q9ET84|Q9ET84\_BACAM Chitosanase OS=Bacillus amyloliquefaciens PE=4 SV=1  
 MKISLKKKAGFWKKTAVSSLIIFTMFFTLMMMSGTVFAAGLNKDQKRRAEQLTSIFENGKTE  
 IQYGYVEALDDGRGYTCGRAGFTTATGDALEVVEVYTKAVPNNKLLKYLPELRRRLAKDES  
 DDISNLKGFASAWRSLGNDKAFRAAQDKVNDSLYYQPAMKRSENAGLKTALAKAVMYDTV  
 IQHGDGDDPDSFYALIKRTNKKMGSSPKDGTDEKKWLNKFLDVRYDDLMPADEDTQDEW  
 RESVARVDVFRDIVKEKNYNLNGPIHVRSEYGNFTIQ

>tr|E3E2V1|E3E2V1\_BACA1 Chitosanase OS=Bacillus atrophaeus (strain 1942)  
 GN=BATR1942\_06760 PE=4 SV=1  
 MKAKVDSWKKTAVSILIFTMFFTLMMNDTVFAAGLNKDQKRRAEQLTSIFENGMTEIQYG  
 YVEHLDPGRGYTCGRAGFTTATGDALEVVEVYTKAVPNNKLLKYLPELRRRLAKEESDDIS  
 NLKGFDSAWRSLGNDKDFRAAQDAVNDRLYYQPAMKRSENAGLKTALAKAVMYDTVIQHG  
 DGDDPDSFYSLIKRTNKKAGGSPKDGIDEKKWLNKFLDVRYDDLMPDTPDRDEWRESV  
 ARVDVLRSLIAKANNYNLNGPINVYSEEGDFVIK

>sp|P33673|CHIS\_BACCI Chitosanase OS=Bacillus circulans GN=csn PE=1 SV=2  
 MHMSNARPSKSRTKFLLAFLCFTLMSALFGATALFGPSKAAAASPDDNFSPETLQFLRNN  
 TGLDGEQWNNIMKLINKPEQDDLNWIKYGYCEDIEDERYTIGLFGATTGGSRDTHPDG  
 PDLEKAYDAAKGASNPADGALKRLGNGKMGKGSILEIKDSEKVFCEGKIKKLQNDAAWRK  
 AMWETFYNVYIRYSVEQARQRGFTSAVTIGSFVDTALNQGATGGSDTLQGLLARSGSSSN  
 EKTfMKNEFHAKRTLVDVNTKYNKPPNGKNRVKQWDTLVDMGKMNLKNVDSEIAQVTDWEM  
 K

>tr|A0EQW7|A0EQW7\_9BACI Chitosanase OS=Bacillus sp. DAU101 GN=csn PE=4 SV=1  
 MKISLKKKAGFWKKTAVSSLIIFTMFFTLMMMSGTVFAAGLNKDQKRRAEQLTSIFENGKTE  
 IQYGYVEALDDGRGYTCGRAGFTTATGDALEVVEVYTKAVPNNKLLKYLPELRRRLAKDES  
 DDISNLKGFASAWRSLGNDKAFRAAQDKVNDSLYYQPAMKRSENAGLKTALAKAVMYDTV  
 IQHGDGDDPDSFYALIKRTNKKMGSSPKDGTDEKKWLNKFLDVRYDDLMPDSEDTEQDEW  
 RESVARVDVFRDIVKEKNYNLNGPIHVRSEYGNFTIQ

>tr|Q9RC18|Q9RC18\_9BACI Thermostable chitosanase OS=Bacillus sp. KFB-CO4 GN=  
 Q9RC18\_BacKFB PE=4 SV=1  
 MREADWWGKAAISLLVFTMFFTLMMSETVFAAGLNKDQKRRAEQLRRICEDGTTEMRYPY  
 VARLDDARPSTCGPAGVTATRDGFEVVPVYKQAVANKKLPNYLAGLRRLEKEASDDTSK  
 LKGPASAWKSLADDKAFRAAQDGVNDQVYYQPAMERSDNAGLTTALARAVMYHTVRQRGD  
 GDDGDSRYALIKRTPKGAGGSPKEGIDEQKCLNKFSHVRYDDLMPGANHRRRDEWRESVG  
 RVHVLRSIANQNNYNLNGGIHVRSEYGNFVIK

>tr|D0FHB6|D0FHB6\_BACIU Chitosanase OS=Bacillus subtilis PE=4 SV=1  
 MKISMQKAAISLLVFTMFFTLMMSETVFAAGLNKDQKRRAEQLTSIFENGTTEIQYGYVE  
 RLDDGRGYTCGRAGFTTATGDALEVVEVYTKAVPNNKLLKYLPELRRRLAKEESDDTSNLK  
 GFASAWKSLANDKEFRAAQDKVNDHLYYQPAMKRSDNAGLKTALARAVMYDTVIQHGDD  
 DPDSFYALIKRTNKKAGGSPKDGIDEKKWLNKFLDVRYDDLMPANHDTREWRESVARV  
 DVLRSIAKENNYNLNGPIHVRSEYGNFVIK

Figure S1. Cont.

>tr|D4FZ80|D4FZ80\_BACNB Chitosanase OS=Bacillus subtilis subsp. natto (strain BEST195) GN=BSNT\_03901 PE=4 SV=1

MKISMQKAAISLLVFTMFFTLMMSETVFAAGLNKDQKRAEQLTSLIFENGTTETIQYGYVE  
RLDDGRGYTCGRAGFTTATGDALEVVEVYTKAVPNNKLLKYLPELRRLLAKEESDDTSNLK  
GFASAWKSLANDKEFRAAQDKVNDHLYYQPAMKRSDNAGLKTALARAVMYDTVIQHGDDG  
DDEPSFYALIKRTNKKAGGSPKDGIDEKKWLNKFLDVRYYDDLMPANHDTRDEWRESVARV  
DVLRSIAKENNYNLNGPIHVSNEYGNFVIK

>sp|O07921|CHIS\_BACSU Chitosanase OS=Bacillus subtilis (strain 168) GN=BSU26890 PE=1 SV=1

MKISMQKADFWKAAISLLVFTMFFTLMMSETVFAAGLNKDQKRAEQLTSLIFENGTTETI  
QYGYVERLDDGRGYTCGRAGFTTATGDALEVVEVYTKAVPNNKLLKYLPELRRLLAKEESD  
DTSNLKGFASAWKSLANDKEFRAAQDKVNDHLYYQPAMKRSDNAGLKTALARAVMYDTVI  
QHGDDGDDPSFYALIKRTNKKAGGSPKDGIDEKKWLNKFLDVRYYDDLMPANHDTRDEWR  
ESVARVDVLRSIAKENNYNLNGPIHVSNEYGNFVI

>tr|Q9XDS6|Q9XDS6\_BURGA Chitosanase A OS=Burkholderia gladioli GN=csnA PE=4 SV=1

MATLPLAAADASARTVHAARAPQAAAAAASPEICSSPWTAARIYEAGNVVSFDGHDYTAA  
YRSQGNAPATASGEAGSQPWVAGEACKPAKLSKAALDHDANFSPATLQFLKDNGLDGE  
QWDNIMKLVNKPEQDSLWTKFYGYCEDIGDDRGYTMGIFGATTGGPNDGGPDGPALFKA  
YDAASGASNPVQGLLARI GAHGS MQSILKITDSEKVF CGKVKGLQNDAAWREAMWRTF  
YSVYIQYSVQQARSRGFGSALTIGSFVDTALNQGADGGSNLQGLLSRSGNSTDEKTFMT  
SFYAQRTKVVDTHDFNQPPNGKNRVKQWSTLMSQGITSLKNCDADIVKVTSWTMK

>tr|E5AQ94|E5AQ94\_BURRH Chitosanase (EC 3.2.1.132) OS=Burkholderia rhizoxinica (strain DSM 19002 / CIP 109453 / HKI 454) GN=RBRH\_02856 PE=4 SV=1

MESALNQLISKTLTRMSCAVAMGLGLLAVSGMARAADDAQPNSEPCDAPWDAKTIYQGGEV  
VSYAGRNYTAAAYWTQGNAPDLNSGDGNTGQPWRVVGQTCNAVANVASGNPDANFSPATLQF  
LKKNTGLDGEQWNNIMKLINKPEQDSLQWTKYGYCQNIHDDRGTITIGIFGATTGGSNDT  
GPDGPELEFKTFDALS GAKIPSAEGLTRIGAHGKMSG SILKISDSSKTFCSKVKAQQNNP  
TWREAMWRTFYNVDIQYSVQQARQRFDSALTIGSFVDTALNQGADGGGDSLKALLARSG  
DSPNEKTFMTRFYAERAKVVDTHDYNTSPNGKNRVKQWSKLMQGETDLKNADAAIVKVT  
NWQLH

>tr|B3PI04|B3PI04\_CELJU Chitosanase Csn46F OS=Cellvibrio japonicus (strain Ueda107) GN=CJA\_3747 PE=4 SV=1

MLTPTQKKTAEAI VNI FETG SVLGDYSNVTLITGDTGHLTFGRSQTTLGSGLKLLQLY  
CANPGARFRQQLTPFLARFAARDFSLDHEEHLKNILRATADHDHIMRETQDLFFDQAYWQP  
AERAATQLGIKTPLVAVVYDSTVHGS AKLIRDKTNQSAGTLASLGEQKWIEAYVATRRY  
WLANHPRKDLRPTVYRMDAFQRLIDLNLWGLELPLVVRGLEISNTTLNATPVNCYDGPQP  
GTRTL SVQAPLLRGLDIRLVQLGLSKSGINLRADGIFNGSVSAVKTFQTKQNL PATGIV  
DNALIAKLVS

>tr|Q7NR53|Q7NR53\_CHRVO Probable chitosanase A OS=Chromobacterium violaceum (strain ATCC 12472 / DSM 30191 / JCM 1249 / NBRC 12614 / NCIMB 9131 / NCTC 9757) GN=CV\_3931 PE=4 SV=1

MKYAAKRLSFPSAILAGLALLAAAGSAAAQGSTAGSPERQTVRLPDCAAWS PASPYQAG  
SVASRGGVNYTAAFWTQGNPPEQQAWQAGKRCRPAAQAKAADHDANFP PATLKFLKANT  
GLDGEQWDNIMKLVNKPEQDSLWTKFYGYCENIGDKRGYTTIGIFGATTGGPNDEGPDGP  
TLFKEFDASSGASNPSIAGGLARAGVHGS MQGKILKISDSAKVFC DKIGSLQNNPAWRDA  
MWNTFYKYVIQYSVQQARQRFSSALTIGSFVDTALNQGATGDSGTLQGLLSRSGNSGDE  
KTFMTAFYAQRSKI VDTNDYNQPPNGKNRVKQWSTLLNMGETDLKNADAAVQKVTNWEMK

Figure S1. Cont.

>tr|A4KCU0|A4KCU0\_9ENTR Putative uncharacterized protein OS=Citrobacter gillenii  
 PE=4 SV=1  
 MILTPAQKSLCERVLNAFETGSAEGDYSIAIAIFHDGPHGIRQITYGRSQTTEYSKLDLV  
 TRYVNAVGRFSADLAPFVFKIGNIALVDNEPFKDLLRRAGRDDPIMKSVQDRFFDERYYL  
 PALKWAQDFGFKDALSLLVLYDSFVHSGTILTLFLRAQFREVPASPAGGDEHTWISQYVEVR  
 NSWLANHSNPELHPTVYRTRKCLRFEIDRGNWDL SQVPINANGIILVGPSPDISVPQNVDTS  
 GGTTRQRSVFWRGSTRLLWFCG

>tr|Q47C49|Q47C49\_DECAR Putative uncharacterized protein OS=Dechloromonas aromatica  
 (strain RCB) GN=Daro\_2852 PE=4 SV=1  
 MSACYAEPHILQFFPSLPSTRRSWKMLTPTQKQTAQSIVNLFETGAVLGHYGNVTVIPGD  
 TGHLTFGRSQVTTLCSGNLLDLLQRYCGNDGARFGDKLSAWLARFEAVDLSLDDDLHLHNL  
 LRATADDPVMRETQDLFFDEVYQWPAKAADNFGIKSALGVAVVYDSVWHGSKWTLRDMT  
 NQKSGPIATLGERAWIKAYVETRRSWLANHSRSDLRGTTTYRMDAFLRLIEQGYWGLALPL  
 VVHGEEISLATLRAMPFGCYDGPQPGTRSIALQTPPLARGLDVRLQLGMSGRGVAIKADG  
 IFGQTSVNLKRFQASQGLPANGIATPQQLSELVD

>tr|D0LGY9|D0LGY9\_HALO1 Peptidoglycan-binding lysin domain protein OS=Haliangium  
 ochraceum (strain DSM 14365 / JCM 11303 / SMP-2) GN=Hoch\_2166 PE=4 SV=1  
 MSNSGYQKRIQNRGSDAADPLQKQVAPGKVTRTRSRMASPVQRKQDGPQDPSAGRTEVANS  
 TVFRHGGGAVDLGGSSAAEVAESGFGSGASDVPYRAEMERSFGTSFSDVQAYS GGDSQGA  
 ATQLSAQAYTVGNRVAFRD SNPSRELVAHELAVVQGRGGEVQAKSEMSQPGDSLEREAD  
 SVAARVASGESVQDHTARYD GAGG PALGSAPMRLVSDAAASETTAAPAADAADAAPAA  
 LLTPEQVQSAIAFYGADRWPAPKIAQVSEKLGIAVREQVDEQFVQAAAAGFQQQRSLTVDG  
 MLGSASIMPLFEGEEMDRAHTMANRI TAEYESSGNYGVVQNADVGIISYGAHQSTLHSGN  
 LGRMLQDYLDRAVAAAEPTQASQTIQSYMGRINDRSQWESLRNEGPLLSALRAAGSEQIM  
 QDAQNAFFSEDFWVPAVKAALNHGITSQLGYATLYDAKIQGGMEDSLQRATSAMGGIVGA  
 TVERNRSQQVTEAEFLVAFNEAREGRLERIAVRRDQGGKRRDAEMLRNSKVRPQAFEEL  
 ARDGNLDSLAVNDGENSLEFRITYGRRTEVDVPEEVGTTPATGDTEAGTGTAPPTTRPTP  
 EVTPTPEALVPTTTPEVTPQPRNPQPSASEYTVKSGDLSAIAGRLLGDQRWREIATLN  
 GITNPRALRVGQVLQVPSSESAAPEGGQSEPEAPAAAPVETAYVVRSGDTLGSIAARFL  
 GSTNRWREIATLNGISDPRRLSVGQRLRIPTGGAQQATPEPEQQRPEQQRPEQQRPEQGG  
 GGAGGGSSPEAGKPSWISVAEGELGVQEI VGSRHNPRVIEYHSTTGRFSDDETPWCASFV  
 NWVLQQAGQSGTGSARALSFESYGTTLDRPAYGSIAVLAYGGGRGHCAFVVGKQGDRMLL  
 LGGNQSNVNIKSFGTSQIVAYVPPGYQPPPSAFALDGATGEVGEVGGGLSDTR

>Cho4239-1\_Jan  
 MQKFAAHPGLPRAAVLFAIMTSLACGGGEQPGAMRKVLISSTVASQTDANAAAADGLSAP  
 AKKEIAMQLVSSSENSSLDWKAQYAYIEDIAMGGYTGGIIGFTSGTSDMLELVTAYDQIK  
 PGNLLSPYLPALRKVNGSASHAGLDPNFVSDWQKAAQDPVFQQSQNTLRDNAYFNPAVSL  
 AKQDGLRRTLQGFIIYDAIVMHGPGTDSQRNSFQNSPQALKKALPPSKGGNETAYLNAFL  
 DVRRALMQSEPDHAGNLDRLDTQQRLFLQNGNLDLNTPLNWKVNGDSYQIR

>tr|E4N811|E4N811\_KITSK Putative chitosanase OS=Kitasatospora setae (strain ATCC  
 33774 / GN=KSE\_15150\_csn1 PE=4 SV=1  
 MHPSKHRTARTARTTRAALAILAGVLPPLTLAATGAGHAATPAAGGTSAVRAAAVAAGLD  
 DPAKKEIAMKLVSSAENS SLDWKAQYKYIEDIGDGRGYTGGIIGFCSGTGDMLELVQHYT  
 DLKAGNVLAKYLPALKKVN GTD SHTGLGS AFVNDWKTAAKD TVFQQA QNDERDRVYFNPA  
 VKQAKADGLRALGQFAYYDAIVMHGPGTADS FGGIRAAALKKAKTPAQGGDEATYIKAF  
 LDARKVVMKQEEAHADTSRVDTEQLVFLNAKNFDLNPPLKWKVYGDPEYINS

Figure S1. Cont.

>tr|E4NEU0|E4NEU0\_KITSK Putative chitosanase OS=Kitasatospora setae (strain ATCC 33774 GN=KSE\_40860\_csn2 PE=4 SV=1

MSFIGSKRGTAVAVAVAGLLAVAIGGLSPATAAGTNLALNKPVTVSSTEASGYSGAKAV  
DGGSTTRWSSSTEQVNDQWIRIDLGAGTAVDRVVLKWEAAYAKAYRVELSDDGSTWRQVYS  
TSSGDGGTDDDLAVSGTGRYLRVYGTQRTAYGYSLWEVEAYGTGGGSTASPSPTASASAS  
ASPTASPSASSSSTPPTGGVNLDDPAKKEIAMKLVSSAENSSLDWRAQFSYIEDIKDG  
RGYTAGIIGFCSGTGMMLDLVEAYTAKKPGNVLASYLPAALRSVNGTDSHQGLDPGFPAAW  
KQAATDPVFTQTQESERDRVYFNPAVAQAKKDGLRALGQFAYYDAAVMHGPDGLASIRSA  
ALAKAKPPAQGGNETTWLNAFLDAREAEMRKEAAHSDTTRVSTEQRKFLNEGNFDLHTPL  
TWSVYGEPEYSITS

>tr|E4NEU7|E4NEU7\_KITSK Putative chitosanase OS=Kitasatospora setae (strain ATCC 33774 GN=KSE\_40930\_csn3 PE=4 SV=1

MRPARPLARRTLLAGAAAAAALVGLNLVPASAAGGGGLTTDQRRRADQLISVFENGTTV  
IQYGYAENINDGRGVTAGRAGFTTNDGDALKVVRAYTEQVPDNPLAAFVPELERLAAAGS  
GDTSGLEADYVTAWKRAADDPAFRRVQDAQVDERYFAPAMADADRLGLTTALARAELFD  
ASVQHGNGSEYDALPALIARTSAKAGTPAAAGEDAWLDAFFDVRIDDLTHPANSATQAEW  
SQSVDRVEALRRIARTGNRNLDPFTVTAFGATHTIS

>sp|P48846|CHIS\_NOCSP Chitosanase OS=Nocardioides sp. (strain N106) GN=CsnN106 PE=3 SV=1

MRLKHPTARLALALVAVPRSVAAAGTVHAAPAPAGATRLAAVGLDDPHKKDIAMQLVS  
SAENSSLDWKSQYKIEDIKDGRGYTAGIIGFCSGTGMMLDLVADYTDLKPGNILAKYLP  
ALRKVNGTESHAGLASAFEKDWATAAKDSVFQQAQNDERDRSYFNPAVNQAKASLRALGQ  
FAYYDAIVMHGPGDSSDSFGGIRKAAMKAKTPAQGRDEATYKAFLAARKTVMLKEEAH  
SDTSRVDTQTVFLNAKNFDLNPPLKWKVYGDSYAINS

>tr|B2J4Y1|B2J4Y1\_NOSP7 Peptidoglycan-binding LysM OS=Nostoc punctiforme (strain ATCC 29133 GN=Npun\_R2009 PE=4 SV=1

MSCKIGSSYTIKPNDFLFEIAARELGDGRWREIMNPNGIPIFTEEEAENLQTGQEIPLPK  
IDEPPQTQEVPGVEFFPPGTLNQNLTLTGLDAQQLTNILGMINGPEQANSKWWQTVDEEII  
YGYAEDIEDGRGVTIGIYGATTKGKYNDADVIWKNYGQDYSNLPVDEIEKVVHAIANDQK  
WWKAQWDAYISTYWQPTLKLKSKNYMKALTIQVGLIDTAMNAGMEDDENSENWGVEHLFTE  
ASDDTDNEEDFVDRFEMELRLQFPTRDSGDMEERIGAWQKLLRDRKWMRVDLKNYVYIPIQ

>tr|O24825|O24825\_9BACL Chitosanase OS=Paenibacillus ehimensis PE=4 SV=1

MHMSNAKPSKSPARKLLALLCCFTLLASLFGATALFQPSKAAAASPENFSPETLQFLRD  
RTGLDGEQWNNIMKLINKPEQDDLNWIKYGYCEDINDERGYSIGIFGATTGGPRDTHPD  
GPELFKAYDAAKAGNPSVEGALKRLGINGKMGSIILEIKDSEKVFCEGKIKKLQNDPAWR  
KAMWETFYINVYIRYSVEQARQRFQTSALTIQSFVDTALNQGATGDSNTLQGLLARSQSST  
NEKTFLLKFKHAKRTLVDVTNEYNQPPNGKNRVKQWDTLLDMGKMNLNKVNDAEIAQVTNWE  
MK

>tr|E3E9P0|E3E9P0\_PAEPS Probable chitosanase A OS=Paenibacillus polymyxa (strain SC2) GN=PPSC2\_c3877 PE=4 SV=1

MFKISSKLI SHKTKFFMILLSFSVIASFSSLYGPLPAKALAEENGTPVQETNESNIQIIP  
LTSEETTTSQTAVTAIDHDANFSPSTLQFLKDNLTGLDGEQWDNIMKLVNKPEQDSLKWTEF  
YGAEDIGDDRGYTIIGIFGATTGGSNDTGPDPALFKAFDAASGASNPSIAGGLARAGLK  
GKMSGSILKLSDSVVIKKIKALQNEAWREAMWRTFYDITYIEYSVQQARKRGFNALT  
IGSFVDTALNQGATGDDGSLEGVLSRSGNSTNEKTFMTNFYAKRTLVDVTNDYNQPPNGK  
NRVKQWSSILLASGETDLKNADVAIKVTNWEMK

Figure S1. Cont.

>tr|Q2PWA1|Q2PWA1\_9BACL Secreted chitosanase OS=Paenibacillus sp. BH-2005 PE=4 SV=1  
 MKFSLLLILLSFSMIFSGYLSNASQQKSYAAGNPDSNFFPATLNPLRDNTGLDGEQWNNI  
 MMLVKNKPEQDDLNWIDFYGYCEDIDDDRGTIVLFGATTGGSNDTGPDPDLFKAYDAAK  
 GASNPSVKGALARIGVKGSMKGKILEINESEESFCRKIGNLQDDPEWREAMWKTFYNIYI  
 KYRGEQARNRGFNSALTIGSFVDTALNHGATGGSESLQGLLSKSGSSTDEKTFMTKFYKE  
 RTKIVDTNEYNSPPNGKNRVKQWSNLLNMGETDLKNADSAVLQVTDWELQ

>tr|A7HRM9|A7HRM9\_PARL1 Peptidoglycan-binding domain 1 protein OS=Parvibaculum  
 lavamentivorans (strain DS-1 / DSM 13023 / NCIMB 13966) GN=Plav\_0939 PE=4 SV=1  
 MLSELQKEAAKAIVNI FETGAVRVDYARVTLLAGDSGHLTYGRAQTTLGSGNLHLLIKAY  
 CEAPGAAYARACEPYLPRLADIDLRLDSDWTFRNLLKEAGADPVMRDTQDAFFDRVYWTP  
 AAASAIRLGLTEALSLAIVYDSVVHGSWISLRDRTLAKAGQPSKAGERAWSLAYVRERRN  
 WLAMHSNTLLRKTIVRMEAFEALIAAKNWSLALPMTVVRGIRIDEPALGYRPPVTASATDV  
 TTRNLRLTSPRMTGNDVRALEAALVKEGYAINCDGVFDEGLEKALKSFQQDYGLIADGVA  
 GPATRIMLG

>tr|Q8KZM5|Q8KZM5\_9PSED Chitosanase OS=Pseudomonas sp. A-01 PE=4 SV=1  
 MKIQRLVALAAAVSLSIGLSGCAASVEAAGTVDDLDPVQKDTAMSLVSSFENSSTDWQAQ  
 YGYLEDIADGRGYTGGLIGFTSGTGMLELVRAYSASSPGNPLEQYIPALEAVNGTDSHA  
 GLGQGFQAWADAAETSEFRAAQDAERDRVYFDPAVAQKADGLSALGQFVYDITLVVHG  
 PGSQRDAFGGIRAEALSAALPPSQGGDETEYLEAFFDARNVIMREEPAHADTSRIDTAQR  
 VFLQNGNFDLERPLTWSVYGDQFSLN

>tr|E1AXU1|E1AXU1\_9PSED Chitosanase OS=Pseudomonas sp. LL2(2010) GN=CHI PE=4 SV=1  
 MKIQRLVALAAAVSLSIGLSGCAASAE TAGTVDDLDPVQKDTAMSLVSSFENSSTDWQAQ  
 YGYLEDIADGRGYTGGLIGFTSGTGMLELVRAHSASSPGNPLEQYIPALEAVNGTGS  
 GLGQGFQAWADAAETSEFRAAQDAERDRVYFDPAVAQKADGLSALGQFAYYDITLVVHG  
 PGSQRDAFGGIRAEALSAALPPSQGGDETEYLEAFFDARNVIMREEPAHADTSRIDTAQR  
 VFLQNGNFDLERPLTWSVYGDQFSLN

>tr|A9WUI6|A9WUI6\_RENSM Chitosanase OS=Renibacterium salmoninarum (strain ATCC 33209  
 GN=RSa133209\_3139 PE=4 SV=1  
 MKLSCIRPQAGGAARNTRRKVLSLLELGAPVPNLRTRTVAVAVGGLLIASGAIAGTAAQA  
 NAVSSLAPAITAVSAASTGDL SAPAKKEIAMQLVCSAENSSLDWKAQYGYIEDIDDDRGT  
 TGGIIGFTSGTGMLELVQNYANTKPDNNVLPFLPVLKRVNGTKSHEGLGQKYVDAWHQ  
 AAKDSVFLKEQDKLRDSMYFNPAVSQKSDGLSNLQGFMYDAIFMHGPGDSSDSFGGIR  
 KSAMKNAKTPAQGGDEKTYLQAFATARKKIMQENAHSDTSRVDDAQLKFLNEGNYDLHT  
 PLKWKVYGDPEYK

>tr|E3FVA7|E3FVA7\_STIAD Uncharacterized protein OS=Stigmatella aurantiaca (strain  
 DW4/3-1) GN=STAUR\_1941 PE=4 SV=1  
 MTTTLFACGAGGDESPGNPEAGPQELESCAYVVAASTHMGSSEWGSITFKNTGTNDIQNP  
 QISFNVPSGVTCGEGPSGWTRLQGGTTCQYTSSSHLLTIGVDTSYTFSYFTDSSTSFTATQ  
 VQVSAVRCASTADEKEGLTATQKTLAEALTRIWENNTPSLDVTLQAASHGALPYEAMSE  
 AKKWGLTTALSKAALYDAFIQHGEAGVRELLQORTHASLVSGQAAPAVGPQGLSEDAWLR  
 GFLEQRDTLAADPEGRYAIDRVATYEQRRRGNWELLTAVQNDVRARDWCWNVAYPDSGF  
 TVRKLNPDGSWSTPASYLYSCR

Figure S1. Cont.

>tr|A0AD68|A0AD68\_STRAM Putative secreted chitosanase OS=Streptomyces ambofaciens ATCC 23877 GN=SAMR0713 PE=4 SV=1

MRHPSDPARPAQTRRRRTVLAMANASLAAVPLLTPPRAAATPARAAGLDDPAKKEIAMRL  
VSSAENSSLDWKAQYGYIEDIRDGRGYTAGIIGFCSGTGDMLDLVELYTARSPGNVLARH  
LPALREVDGSDSHEGLDPGYPGDWQRAAGDPEFRRAQDDERDRVYFGPAVRQAQADGLRT  
LGQFAYYDAIVMHGGGGDRLGFGSIRDRALGRARPPAGGGDEVAYLHAFLDARVWAMKQE  
EAHSDTSRVDTAQRVFLREGNLDLDPPLDWQVYGDSYHVG

>SAV\_6191

MKRAALLLLTAVPAAVA AATAVYLFGLAPSDPDRTESPKPPSRQSSASAQGLNAPAKKEL  
AQEIVASAENSTLDWRSAYGYVEDIGDGRGYTAGVIGFCTGTHDLLTLVERYTKDHPGNG  
LARFLPALRAVDGTDSHAGLGRAFTAAWRAEAGVAAFRAAQDAERDRVYFDPAVRLARHD  
GLGALGQFIYYDAMVVHGPPTDPHSLQGIRARALREADTPAEGGSETRYLDAFLDVRRTV  
MKSEKSHHDTTRIDTAQRFLYDGNLRLRTPLEWRVYGERYRVP

>SAV\_2015

MHSPHIRTSTRLLALIGASLVAGPLVANQSATAAPVGLDDPAKKEIAMKLVSSAENSSL  
DWKAQYKYIEDIGDGRGYTAGIIGFCSGTGDMLDLVELYTQRKPGNVLATYLPALRNNG  
GDShQGLDPGFPGDWRRAAQDSAFQQAQNDERDRVYFDPAVRQKADGIGVLGQFTTYDA  
IVMHGDDGSDSTSFSSIRGRALAKAEPQAQGGNEVTYLNALFLDARVWAMRQEEAHSDTSRV  
DTAQRVFLTKGNLNLDPPLDWKVYGDSYHIG

>tr|D7BYX5|D7BYX5\_STRBB Chitosanase OS=Streptomyces bingchenggensis (strain BCW-1) GN=SBI\_02563 PE=4 SV=1

MPKRIGLVAAAVAVPAALVLTSSVIGIQAAEHTPSSAQAVKAEHRTAAVKNLDDPAKKEIA  
MKLVSSAENSSLDWRAQFKYIEDIDDGRGYTAGIIGFCSGTGDMLLEVEYTTQVKPGNVL  
AKYLPALREVDGSDSHDGLDPNFTKDWKKAEDKAFQDAQEHERDRVYFNPSVVSQKADG  
IGTLGQFIYYDAIVMHGPGDSKYSFGGIRKTAMSKAKTPAQGGDEKTYLNALFLDARKKAM  
QSEEPHSETSRVDTEQRKFLNEGNLGLPEPLKWKVYGDPEIN

>tr|Q9S2Z1|Q9S2Z1\_STRCO Putative chitosanase (Putative secreted protein) OS=Streptomyces coelicolor (strain ATCC BAA-471 / A3(2) / M145) GN=SCO2024 PE=4 SV=1

MKRAGVLLLGALPVIAAGVYFVAVPDDSDPADTAAASSSSSATARSRRDDAKDRAERERE  
ADDALIADLPPGLAAPAKKELAQQLVSSAENSTTKWRTAYGSIEDVGDGDGYTAGIIGFC  
TGTHDLLMLVERYTEDHPDNGLAEYLPALREVDGSDSHEGLDPGFATAAWKAEAEVPAFRA  
AQEAERDRVYFEPAVRLAKLDGLGTLGQFVYDAMVFHGPDTDAEGFYGLRERAMAEART  
PGQGSEKAYLETFLDVRKQAMEAKRPGIDTSRVDTAQRRLTAGNLKLATPLVWEMYGD  
TYRVP

>tr|Q9RJ88|Q9RJ88\_STRCO Secreted chitosanase OS=Streptomyces coelicolor (strain ATCC BAA-471 / A3(2) / M145) GN=SCO0677 PE=4 SV=1

MRHPFRDPARPAQPSRRRTVLAMACASLATVPLFTPSHAAAASARATGLDDPAKKEIAMQL  
VSSAENSSLDWKAQYRYIEDIGDGRGYTAGIIGFCSGTGDMLDLVELYGERSPGNVLAPY  
LPALRRVDGSDSHEGLDPGFDDWRRAADQDPQFRRAQDDERDRVYFDPAVRRGKEDGLR  
TLGQFAYYDAMVMHGDGGGLGFGSIRERARALGRARPPAQGGDEVAYLHAFLLDERVWAMKQE  
QAHSDTSRVDTAQRVFLNEGNLDLEPPLDWHVYGDAYHIG

Figure S1. Cont.



>BN159\_0394

MRRNTMLWQAITATVLTGGIVVGVGLTPASAAAGSNLALGKPV TASSVEGAGFEPKAVD  
 GSTSTRWASLEGVDNQWIQIDLGSVTDVAQVVLKWEAAAYAKSYRVEVSDDGSTWRQVYST  
 TTGNATDDLAVSGSGRYLRVYGTQRATAYGYSLEYEVEVYGDSP TSPDPTTTPDSTTNLL  
 AGRPTSVSSVEGTGFEFGKAVDGSTSTRWASVEGVDPQWLRVDMGSKTKTVGRVVLKWEAA  
 YAKSYRVEVSDDGSTWRQVYSTTTGDGGTDDLAVSGSGRYLRVYGTQRATAYGYSLEYEVE  
 AYGTGSTTTPPSDTANLDDPAKKEIAMKLVSSSFENSSLDWRAQFAYIEDIGDGRGYTAGI  
 IGFCSGTGDMLDLIVERYTQKKPSNPLAPYLPALREVN GTDSHAGLGTSFENAWRTAAQDS  
 VFTKTQEEERDRVYFNPAVGGQAKTDGLKALGQFAYYDAAVMHGEEGFRAIRSRAVSRVKP  
 PSQGGNEVTFLHAFLDEREEMRKEEAHSDTTRVSTAQRRLNEGNLHLNIPLYWSVYGE  
 SFSITS

>BN159\_0876

MRHPTRRLLAATVASTAAIPLLNAGHAGAVRAPGLDDPAKKEIAMKLVSSAENSSLDWK  
 AQYKYIEDIGDGRGYTAGIIGFCSGTGDMLDLVELYTD RSPGNVLAKYLPALRAVDGTDS  
 HAGLDPDYPRDWRRAAQDRAFQQAQNDERDRVYFDPAVRQ GKADGLRALGQFAYYDAIVM  
 HGGGSDRLSFGSIRRRALQSARPPAQGGDEVRYLHAF LDARVWAMKQEEAHSDTSRVDTA  
 QRVFLRQGNL DLNPPLDWKVYGDSYHIG

>BN159\_6425

MRRTGILAFALAPVVLTAGAYFLMPTDSAESPAAPPVSAAQLAREEAKERAEETERAEDEK  
 TIASLPPGLADPAKKE LALKITATAEFSSLNWRLGYGSVEDNGDGC GYTAGAIGFC TGTH  
 DLLDLIVERYTETHPDNGLARYLPALRKVDGTDSHEGLD PGFPAAWKAEAKKPAFRAAQDE  
 ERDEVYFNPAVRLAKLDGLGTLGQFVYDAMVLHGPDPSANGFYGLRERALHEARLP SRG  
 GSEKAYLDIFLDLREQAMKRKSTADTSRVSTAQREWLYDGNLSLNTPLSWRMYGEPYQV  
 S

>tr|C9E0E7|C9E0E7\_STRLI\_CsnA\_OS=Streptomyces lividans TK24 GN=csnA PE=4 SV=1

MRHPFRDPAFAGPSRRITVLAMACASLATVPLFTPSRAAAASARATGLDDPAKKEIAMQL  
 VSSAENSSLDWKAQYRYIEDIGDGRGYTAGIIGFCSGTGDMLDLVELY GQRS PGNVLAPY  
 LPALRRVDGSDSHEGLD PGFPDDWRRAADQDPQFRRAQDDERDRVYFDPAVRRGKEDGLR  
 TLGQFAYYDAMVMHGDGGGLGFGSIRERALGRARPPAQGGDEVAYLHAF LDERVWAMKQE  
 EAHSDTSRVDTAQRVFLNEGNL DLEPPLDWHVYGDAYHIG

>tr|Q7WT07|Q7WT07\_9ACTO\_Putative secreted chitosanase OS=Streptomyces sp. AM-7161  
 GN=csn\_StrAM-7161 PE=4 SV=1

MPPTINGCAAAA SRPSSPPRPPASCSPPLAGLTSATAAAVNLAANRPVTTSSSTESGSFGG  
 AKAVAGSASTRWASAEVDNQWIRIDLGSATTLGRVVLKWEAAAYARAYRVELSDDGSTWR  
 QIHATTTGDGGTDDL SVNGTGRYL RVFGTQRGTPYGYSLYEVEAYGAGATTPPPSSGTGL  
 DDPKKEVAMKLVSSSFENSSLDWRAQFAYIEDIDDGRGYTAGIIGFCSGTGDMLDLIVERY  
 TAKKPGNPLARYLGALRAVDGTDSHEGLD PGFTNAWRQAAQDTVFQQTQEEERDRVYFTP  
 AVSQAKQDGLRALGQFAYYDAAVMHGEGSFRD IRSVALS RALPPSRGGDEKAYLKAFLDA  
 REEMRKEEAHSDTTRVSTAQRRLNEGNL DLNTP LHWVYGEAFSLTG

>CsnN174

MHSQHRTARIALAVVLTAI PASLATAGVGYASTQASTAVKAGAGLDDPHKKEIAMELVSS  
 AENSSLDWKAQYKYIEDIGDGRGYTGGIIGFCSGTGDMLDLVQHYTDLEPGN ILAKYLP  
 LKKVNGSASHSGLGTPFTKDWATAAKD TVFQQAQNDERDRVYFDPAVSQAKADGLRALGQ  
 FAYYDAIVMHGPGNDPTSFGGIRKTAMKKARTPAQGGDETTYLNAFLDARKAAMLTEAAH  
 DDTSRVDTQQRVFLKAGNLDLNPPLKWKTYGDPYVINS

Figure S1. Cont.



>SACTE\_5457

MLHPHNRTARRTTRLTRTGGLAAAAALGLALMALPVTAHAGAPTQPAHHLEAAATGLDDP  
AKKDIAMQLVSSAENSTLDWKAQYGYIEDIGDGRGYTAGIIGFCSGTGDMMLALVERYTDR  
SPGNVLASYLPALREVDGTDSDHGLDPGFPRDWAEAAKDPVFQQAQNDERDRVYFDPAVR  
QAKDDGLGTLGQFAYYDAIVMHGGGGDSTSFSGSIRQRALAEAEPPSRGGDEVAYLDAFLD  
ARVWAMRQEEAHS DTSRVDTAQRVFLRDGNLNLDPPLDWQVYVYGDSEFHIG

>SACTE\_5458

MKTKLLALAAALALTGCSGPGPDAPEKGLADPAKKDIAMRLVSSAENSTLDWKAQYGYIE  
DIGDGRGYTAGVIGFCSGTGDMMLKVVERYTAARPGNALERFLPALRAVVGDSHEGLGDA  
FTEAWARVADDTAFFRAQDAERDETYFDPAVARAEADGLSALGQFVYDAFVMHGYADAK  
GTVGFRTIRAEAVEAADPPSRGGDEEAYLDAFLDARVRAIRQEP SHSDASRVETAQRV FV  
HEGRLQLETPLVWKVYGESFRIDGP

>SACTE\_5886

MPVKPVTRLVLFGAPIATAASILFSRGDSEPPKLTPOAAAPAPSDQEEPEAVARAEHAE  
EIDALPPGLAAPEMKEIASRLVSSADASTLDWRSRYGAVEDLGDGNGYTAGIVGFCSGTN  
DMLQLVEAYTEEQPDNPLAPYLPALREVDGSDSHEGLDPGFTRAWREAAEDETFRSAQDR  
LRDRLYFDPAVRLAKLDGLGTLGQFVYDAMVLHGPGVEANGFYGIRDAAMAQADTAAEG  
GDETAYLDAFLDAGRTAIRARTVQRDTSRIDTAQRVFLRDGNLELRTPLVWRMYGEDFRIP

>tr|D2AW85|D2AW85\_STRD Chitosanase OS=Streptosporangium roseum (strain ATCC 12428 / DSM 43021 / JCM 3005 / NI 9100) GN=Sros\_2053 PE=4 SV=1

MPISSDPRPGRRALRLLLPVVAAPALVLFAGPGHAAVPAPHL SAPSQGSVTAAAADLT  
DPRKKDIAMQLVSSAENSSLNWKAQYKYIEDIDDGRGYTAGIIGFCSGTGDMLELVELYA  
ERKPGNVLAKYLPALRKVDGTD SHKGLDPNYTKDWATAAKDKVFQQAQNDERDRVYFNPA  
VQQA KDKGLRALGQFAYYDAIVMHGDGGDPESFSSIRRNALKKAKPPAQGGDEVKYLHAF  
LDARKVAMKAEAEHEDTSRVDTAQRVFLNKGNDLNLTPLSWKVYGDPTTIG

>tr|C4KDK1|C4KDK1\_THASP Peptidoglycan-binding domain 1 protein OS=Thauera sp. (strain MZ1T) GN=Tmz1t\_3574 PE=4 SV=1

MERIIPCTDCAEKTLDVEQLGFRVTS CDPHPERPGFCVLR FEDRSATPAAGASLAAPAAA  
ARAGRGAVAGGVTATQAAVAKAIVNLFETGEVLGQYGVKVTLIPGDTGHLTFGRSQTTLGS  
GNLAKLLQQYCANPGARFAGRLASYLPRFLAIDESLDDD PRLHNVL RATADDPVMRD TQD  
AFFDRTYWEPALRAAASLGVHTPLGVAVVYDSAVHGSWLAMRDR TTRAVGEPAAVGEQAW  
IDAYVRTRRAWLEGHARADLRQTVYRMEAFGRLLIDQGFWGLEMPLVVVRGREISSVTLAAL  
PPGCYDGPQPSRPLTLATPLARGLDVRLQLGLSDRGVDILADGIFGR TSNLLKAWQA  
QHGLAATGIADPALIGELTA

>tr|A7K8G4|A7K8G4\_9PHYC Putative uncharacterized protein Z204R OS=Acanthocystis turfacea Chlorella virus 1 GN=Z204R PE=4 SV=1

MFAISMSITPENKQSIADYVCRMALAEKELNAVGDYKGLGNRRVQFKTALGNALIK  
GDPVPTPDPEQSHDTKPAPGNVPTPGPSTGTTRIPSSIVPQLATLGFSETDADTILSLIS  
LPENSNTTEWKNYNFASRLGDGRGWTVTLYGACSGTGDLMILKDLQKINPHHKLVKYIP  
AMEKTEGEDVVRGLENLGRDIKSLGDDKEWQAVWDIYIKLYWNFARNFSDKLINRPGAKL  
TSPLTRGFMDTALNHGADLDSFGPI LKGMNNDKDEATWFLDFCESRRKLLKRGFQDL  
DTSKTGDRCTLWANI FKSNTSLTRPIKCYRKYWGNTIS

Figure S1. Cont.

```

>tr|Q84608|Q84608_PBCV1 Chitosanase OS=Paramecium bursaria Chlorella virus 1
GN=A292L PE=4 SV=1
MSNKIEITDDNKMTIQNDFVSRMMKSIDQELVAMTNKYSGFGPGRQTNCKKALAKALGET
PVNPPVNPVPTPPVDTHIPSQVEAPLKKLGFNTTNADTILSLIALPENSTTQWWKNYNYA
SCLKDGRGWTVTIYGACSGTGDLLMVLESLSQKINPNHPLVKFIPAMRKTKGDDIRGLENL
GKVINGLGDDKEWQTAVWDIYVKLYWTFAADFSDKTGSAKNRPGPVMTSPLTRGFMVDVA
LNHGSNMESEFSDILKRMKNREEKDEAKWFDFCETRRKLLKAGFQDLDTSKTGDRCTLWA
NIFKEGNVGLKRPIKCYNGYWGKNIVIS

>tr|O12288|O12288_9PHYC VChta-1 protein OS=Chlorella virus GN=vChta-1 PE=4 SV=1
MSNKIEITDDNKMTIQNDFVSRMMKSIDQELVAMTNKYSGFGPGRQTNCKKALAKALGET
PVNPPVNPVPTPPVDTHIPSQVEAPLKKLGFNTTNADTILSLIALPENSTTQWWKNYNYA
SCLKDGRGWTVTIYGACSGTGDLLMVLESLSQKINPNHPLVKFIPAMRKTKGDDIRGLENL
GKVINGLGDDKEWQTAVWDIYVKLYWTFAADFSDKTGSAKNRPGPVMTSPLTRGFMVDVA
LNHGSNMESEFSDILKRMKNKDEKDEAKWFDFCETRRKLLKSGFQDLDTSKTGDRAILWS
ELEFKTGNVGLKRPIKCYNGYWGKNIVIS

>tr|A7RBE5|A7RBE5_PBCVA Putative uncharacterized protein C342L OS=Paramecium
bursaria Chlorella virus AR158 GN=C342L PE=4 SV=1
MFMTSRIEITEDNKSKIQNDFVSKMEDIEQELDAMTKKYSGFGPGRQTNFKRALSRALE
ETLVKPPIVPPVDSHIPSHVEASLKQFGFSIENADMILSLISLPENSTIEWWKNYNYAER
LHDGRGWTVTLYGACSGTGDLLMILEALQKINSKHPLVKFIPAMRKTKGDDIRGLENLKG
VINVLGDDKEWQEAVWEIYIKLYWTFATDFADKKNSAKNRPGAVLTSPLTHGFMIDVALN
HGANMESEFEPILKNMKNREEKDEAKWFDFCEARRKLLKSGFQQLDTSKTGDRCTLWANI
FKSGNVGLKRPIQCFDGYWGKNFIIA

>KUTG_00281
MRARCLVAATMLAVGVAVGGCGSDVPNGPTATSKAPRPGGGLTADQRRRADQLISIFENG
TATVQYGYAEDLHDGRGVTAGRAGYTTNDGDALRVIQAYTDLAPGNGLARFAPALRQLAD
TGSGDLPEADYIAAWRQAADDPAFRRVQDDQVEQNYFTPAMAAADRLGLITPLARAELYD
AAIQHGHGADPDGLPALIDRATARAGKVDEAAWLTAFLDVRADDLRNPANADTKEEWSKS
TDRVECFRRIAATGDYTLAGPLTVTAYGVTYSLA

```

**Figure S1:** FASTA-formatted sequences of all the proteins presented on the phylogenetic tree (Figure 1).

xxxxxxx α-helix  
 xxxxxxx 3/10 helix  
 xxxxxxx β-strand

```

Npun_R2009          -----TEEEAENLQTGQ-----EICLPKIDEPPTQEVPGVEFFPPGTLNQLNLTGLD
RBRH_02856         -----LNSGD--GNTGQPWRVGTCTNAVA---NVASGNPDANFSPATLQFLKKNLTGLD
PPSC2_c3877       -----QETNE--SNIQQI-PLTSEETTSQT--AVTAIDHDANFSPSTLQFLKDNLTGLD
CV_3931            -----QGQAWQAGKRCRPAAQ--AK-AADHDANFPPATLKFLLKANTGLD
Q2PWA1_9BACL      -----SQQK--SYAAGNPDNSNFFPATLNPLRDNLTGLD
Q9XDS6_BURGA      -----TASGE--AGSGQPWVAGEACKPAKL--SKAALDHDANFSPATLQFLKDNLTGLD
CHIS_BACCI        1 -----ASPDDNFSPETLQFLRNNTGLD 22
O24825_9BACL      -----ASPDENFSPETLQFLRDRNTGLD
A7K8G4_9PHYC      LIKGDV-----VTPDPPEQSHDTKPAPGNV--PTPGPSTGTTRIPSSIV-PQLATLGF
A7RBE5_PBCVA      LEETLV-----K---P-----PIVPPVDSHIPSHVE-ASLKQVGF
Q84608_PBCV1      LGETPV-----NPPVNP-----PVTTPVDTHIPSQVE-APLKKLGF
O12288_9PHYC      LGETPV-----NPPVNP-----PVTTPVDTHIPSQVE-APLKKLGF
Hoch_2166         -AGGP-----ALGSAPMRLVDSDA--AS--ETTAAP-AADAAA---D-AAPAALLT
STAUR_1941        GAGGDES--PG-----NPEAG--P-----
A4KCU0_9ENTR      -----MILT
Play_0939         -----MLS
Tmz1t_3574        DPH-----PE--RPGFCVLRFEEDRSATPAAG--ASLAAPAAAARAG---R-GAVAGGVT
CJA_3747          -----MLT
Daro_2852         YAE-----PH--ILQFFPS-----LPS---T-RRSWKMLT
Cho4239-1_Jan     -----adglsa
SCO2024           DSADPADTAAA--SSSSSATARSDDAKDRA--E--REREADDALI---A-DLPPGLAA
BN159_6425        dsaespaapp-----vsaaqlareekera--e--teraedekti---a-slppglad
SACTE_5886        --FSRGDSEPPKLTPOAAAPAPSDQE-EPEAV--A--RAEEHAEI---D-ALPPGLAA
KSE_40860_csn2    EAYGTGGGSTASPSPTASASASA----SPTAS--P--SPSASSSTTP---P-TGGVNLDD
BN159_0394        eaygtgst-----tpp---p-sdtanltd
Csn_StrAM-7161    EAYGAGAT-----TPP---P-SSGTGLDD
SAV_6191          -----l-----aps----dpdrt--e--spk-ppsrsqs---s-asaqglna
E1AXU1_9PSED     1 -----ET-AGTVDLDA 10
Q8KZM5_9PSED     -----AGTVDLDA
SACTE_5458        -----APEKGLAD
Amir_4331         DAWSPYQ-----RWT----TPGGG--T--NPT-TTTTSQ---V-PGRSDLAT
Sros_2053         -----A---VPAPH--L--S-A-PSQGSV---T-AAAADLTD
SCO0677           -----AAA---S-ARATGLDD
C9E0E7_STRLI     -----A---S-ARATGLDD
SACTE_5457       40 -----ga-p--t-q-paahhl---e-aaatgld 59
SAV_2015         -----APVGLDD
SAMR0713         -----T---P-ARAAGLDD
BN159_0876       -----vrapgldd
RSa133209_3139   -----A-----AQA---NA-VS--S--LAP-AITAVS---A-ASTGDLSA
AORI_1736        -----SI---F-ASGGDLAS
SBI_02563        -----AEH---TP-SS--A---QA-VKAEHR---T-AAVKNLDD
AMED_6991        -----A--P--APL-AASSAS---V-LATGDLSA
CsnN106          -----A---GT-VH--A--AP--APAGAT---R-LAAVGLDD
CsnN174          1 -----AGAGLDD 7
Cho_AmyCSO-2     -----AA--P--AA--PAAA--V---S-VASVGLDD
KSE_15150_csn1   -----A---TP-AA--G--GT--SAVRAA---A-VAAVGLDD
KSE_40930_csn3   -----AAGGGLTT
KUTG_00281       -----SDVPNGP-TAT-SKAPRPGGGLTA
Q9RC18_BacKFB    -----AGLNK
BAMF_3066        -----AGLNK
Q9ET84_BACAM     -----AGLNK
RBAM_029740      -----AGLNK
AOEQW7_9BACI    -----AGLNK
DOFHB6_BACIU     -----AGLNK
BSNT_03901       -----AGLNK
BSU26890         -----AGLNK
QOPVM7_BACAM     -----AGLNK
BATR1942_06760   -----AGLNK
  
```

Figure S2. Cont.



|                |                                                           |      |
|----------------|-----------------------------------------------------------|------|
| Npun_R2009     | AQQLTNILG-MINGPEQANSKWWQT-----VDEEIIYGYAE-DIED----        | G    |
| RBRH_02856     | GEQWNNIMK-LINKPEQDSLQWT-----KYYGYCQ-NIHD----              | D    |
| PPSC2_c3877    | GEQWDNIMK-LVnkPEQDSLKWT-----EFYGYAE-DIGD----              | D    |
| CV_3931        | GEQWDNIMK-LVnkPEQDSLQWT-----KfyGYCE-NIGD----              | K    |
| Q2PWA1_9BACL   | GEQWNNIMM-LVnkPEQDDLNI-----DFYGYCE-DIDD----               | D    |
| Q9XDS6_BURGA   | GEQWDNIMK-LVnkPEQDSLQWT-----KfyGYCE-DIGD----              | D    |
| CHIS_BACCI     | 23 GEQWNNIMK-LINKPEQDDLNI-----KYYGYCE-DIED----            | E 56 |
| O24825_9BACL   | GEQWNNIMK-LINKPEQDDLNI-----KYYGYCE-DIND----               | E    |
| A7K8G4_9PHYC   | SETDADTILSLISLPENSNTTEWWK-----NYNFAS-RLGD----             | G    |
| A7RBE5_PBCVA   | SIENADMILSLISLPENSTIEWWK-----NYNYAE-RLHD----              | G    |
| Q84608_PBCV1   | NTTNADTILSLIALPENSTTQWWK-----NYNYAS-CLKD----              | G    |
| O12288_9PHYC   | NTTNADTILSLIALPENSTTQWWK-----NYNYAS-CLKD----              | G    |
| Hoch_2166      | PEQVQSAIA-----FYGADRWPAKIAQVSEKLGIAVREQVDEQFVQAAAGFQQ---- | Q    |
| STAU_R1941     | -QELESCAYVVAASTHMGSWSITFKNTGT-----NDIQNPQISFNVP-----      |      |
| A4KCU0_9ENTR   | PAQKSLCER-VLNAFETGSAE--G-----DYSAIA-IFHDGPHGI             |      |
| Plav_0939      | ELQKEAKA-IVNIFETGAVR--G-----DYARVT-LLAG--DS               |      |
| Tmz1t_3574     | ATQAAVAKA-IVNLFETGEVL--G-----QYGVKVT-LIPG--DT             |      |
| CJA_3747       | PTQKKTAEA-IVNIFETGSVL--G-----DYSNVT-LITG--DT              |      |
| Daro_2852      | PTQKQTAQS-IVNLFETGAVL--G-----HYGNVT-VIPG--DT              |      |
| Cho4239-1_Jan  | pakkeiamq-lvssenssldwka-----qyayie-diam--g                |      |
| SCO2024        | PAKKELAQQ-LVSSAENSTTKWRT-----AYGSIE-DVGD--g               |      |
| BN159_6425     | pakkelalk-itataefsslwrl-----gygsve-dngd--g                |      |
| SACTE_5886     | PEMKEIASR-LVSSADASTLDWRS-----RYGAVE-DLGD--G               |      |
| KSE_40860_csn2 | PAKKEIAMK-LVSSAENSSLDWRA-----QFSYIE-DIKD--G               |      |
| BN159_0394     | pakkeiamk-lvssfenssldwra-----qfayie-digd--g               |      |
| Csn_StrAM-7161 | PRKKEVAMK-LVSSFENSSLDWRA-----QFAYIE-DIDD--G               |      |
| SAV_6191       | pakkelaqe-ivasaenstldwrs-----aygyve-digd--g               |      |
| E1AXU1_9PSED   | 11 PVQKDTAMS-LVSSFENSSTDWQA-----QYGYLE-DIAD--G 44         |      |
| Q8KZM5_9PSED   | PVQKDTAMS-LVSSFENSSTDWQA-----QYGYLE-DIAD--G               |      |
| SACTE_5458     | PAKKDIAmr-LVSSAENSTLDWKA-----QYGYIE-DIGD--G               |      |
| Amir_4331      | PAKKDIAmr-LVSSAENSSLDWRA-----QFAYIE-DIGD--G               |      |
| Sros_2053      | PRKKDIAMQ-LVSSAENSSLDWKA-----QYKYIE-DIDD--G               |      |
| SCO0677        | PAKKEIAMQ-LVSSAENSSLDWKA-----QYRYIE-DIGD--G               |      |
| C9E0E7_STRLI   | PAKKEIAMQ-LVSSAENSSLDWKA-----QYRYIE-DIGD--G               |      |
| SACTE_5457     | 60 pakkdiamq-lvssaenstldwka-----qygyie-digd--g 93         |      |
| SAV_2015       | PAKKEIAMK-LVSSAENSSLDWKA-----QYKYIE-DIGD--G               |      |
| SAMR0713       | PAKKEIAMR-LVSSAENSSLDWKA-----QYGYIE-DIRD--G               |      |
| BN159_0876     | pakkeiamk-lvssaenstldwka-----qykyie-digd--g               |      |
| RSa133209_3139 | PAKKEIAMQ-LVCSAENSSLDWKA-----QYGYIE-DIDD--D               |      |
| AORI_1736      | PEKKEIAMQ-IVSSAENSSLDWKA-----QYSYIE-DIGD--G               |      |
| SBI_02563      | PAKKEIAMK-LVSSAENSSLDWRA-----QFKYIE-DIDD--G               |      |
| AMED_6991      | PAKKEIAMK-LVSSAENSSLDWKA-----QYKYIE-DIGD--G               |      |
| CsnN106        | PHKKDIAMQ-LVSSAENSSLDWKS-----QYKYIE-DIKD--G               |      |
| CsnN174        | 8 PHKKEIAME-LVSSAENSSLDWKA-----QYKYIE-DIGD--G 41          |      |
| Cho_AmyCSO-2   | PAKKEIAME-LVSSAENSSLDWKA-----QYKYIE-DIGD--G               |      |
| KSE_15150_csn1 | PAKKEIAMK-LVSSAENSSLDWKA-----QYKYIE-DIGD--G               |      |
| KSE_40930_csn3 | -DQRRRADQ-LISVFENGTTV--I-----QYGYAE-NIND--G               |      |
| KUTG_00281     | -DQRRRADQ-LISIFENGTAT--V-----QYGYAE-DLHD--G               |      |
| Q9RC18_BacKFB  | -DQKRRAEQ-LRRICEDGTTE--M-----RYPYVA-RLDD--A               |      |
| BAMF_3066      | -DQKRRAEQ-LTSIFENKTE--I-----QYGYVE-ELDD--G                |      |
| Q9ET84_BACAM   | -DQKRRAEQ-LTSIFENKTE--I-----QYGYVE-ALDD--G                |      |
| RBAM_029740    | -DQKRRAEQ-LTSIFENKTE--I-----QYGYVE-ALDD--G                |      |
| A0EQW7_9BACI   | -DQKRRAEQ-LTSIFENKTE--I-----QYGYVE-ALDD--G                |      |
| D0FHB6_BACIU   | -DQKRRAEQ-LTSIFENGTTE--I-----QYGYVE-RLDD--G               |      |
| BSNT_03901     | -DQKRRAEQ-LTSIFENGTTE--I-----QYGYVE-RLDD--G               |      |
| BSU26890       | -DQKRRAEQ-LTSIFENGTTE--I-----QYGYVE-RLDD--G               |      |
| Q0PVM7_BACAM   | -DQKRRAEQ-LTSIFENGMTE--I-----QYGYVE-HLPD--G               |      |
| BATR1942_06760 | -DQKRRAEQ-LTSIFENGMTE--I-----QYGYVE-HLPD--G               |      |

Figure S2. Cont.



|                |                                                                |                                   |     |
|----------------|----------------------------------------------------------------|-----------------------------------|-----|
| Npun_R2009     | RGVTIG--IYG-----                                               | -----ATTGKGYN---DADVIWKNYQD       |     |
| RBRH_02856     | RGYTIG--IFG-----                                               | -----ATTGGSNDTGPDPPELKFKFDAL      |     |
| PPSC2_c3877    | RGYTIG--IFG-----                                               | -----ATTGGSNDTGPDPGPALEKAFDAA     |     |
| CV_3931        | RGYTIG--IFG-----                                               | -----ATTGGPNDEGPDGPTLFKEFDAS      |     |
| Q2PWA1_9BACL   | RGYTIV--LFG-----                                               | -----ATTGGSNDTGPDPDPLFKAYDAA      |     |
| Q9XDS6_BURGA   | RGYTMG--IFG-----                                               | -----ATTGGPNDDGGPDGPALEKAYDAA     |     |
| CHIS_BACCI     | 57 RGYTIG--LFG-----                                            | -----ATTGGSRDTHPDGPDLEKAYDAA      | 88  |
| O24825_9BACL   | RGYSIG--IFG-----                                               | -----ATTGGPRDTHPDGPELKFAYDAA      |     |
| A7K8G4_9PHYC   | RGWTVT--LYG-----                                               | -----ACSGTG----DLVMILKDLQK-       |     |
| A7RBE5_PBCVA   | RGWTVT--LYG-----                                               | -----ACSGTG----DLLMILEALQK-       |     |
| Q84608_PBCV1   | RGWTVT--IYG-----                                               | -----ACSGTG----DLLMVLESLOK-       |     |
| O12288_9PHYC   | RGWTVT--IYG-----                                               | -----ACSGTG----DLLMVLESLOK-       |     |
| Hoch_2166      | RSLTVD--GMLGSASIMPLFEGEEMDRAHTMANRITAEYESSGNYGVVQNAVVGIIISYGAH |                                   |     |
| STAU_R_1941    | SGVTCGEGPSGWT---RL-----                                        | -----QGGTTCQYTSSSH----LTIGVDTSYTF |     |
| A4KCU0_9ENTR   | RQITYG--RSQ-----                                               | -----TTEYS-----KLQDLVTRYVN-       |     |
| Plav_0939      | GHLTYG--RAQ-----                                               | -----TTLGSG-----NLHLLIQYCE-       |     |
| Tmz1t_3574     | GHLTFG--RSQ-----                                               | -----TTLGSG-----NLAKLLQYCA-       |     |
| CJA_3747       | GHLTFG--RSQ-----                                               | -----TTLGSG-----NLGKLLQYCA-       |     |
| Daro_2852      | GHLTFG--RSQ-----                                               | -----TTLCSG-----NLLDLLQRYCG-      |     |
| Cho4239-1_Jan  | -gytgg--iig-----                                               | -----ftsqts-----dmlslvtaydq-      |     |
| SCO2024        | DGYTAG--IIG-----                                               | -----FCTGTH----DLLMLVERYTE-       |     |
| BN159_6425     | cgyttag--aig-----                                              | -----fctgth----dlldlveryte-       |     |
| SACTE_5886     | NGYTAG--IVG-----                                               | -----FCSGTN----DMLQLVEAYTE-       |     |
| KSE_40860_csn2 | RGYTAG--IIG-----                                               | -----FCSGTG----DMLDLVEAYTA-       |     |
| BN159_0394     | rgyttag--iig-----                                              | -----fcsqtg----dmlslverytq-       |     |
| Csn_StrAM-7161 | RGYTAG--IIG-----                                               | -----FCSGTG----DMLDLVERYTA-       |     |
| SAV_6191       | rgyttag--vig-----                                              | -----fctgth----dlldlverytk-       |     |
| E1AXU1_9PSED   | 45 RGYTGG--LIG-----                                            | -----FTSGTG----DMLDLVRAHSA        | 70  |
| Q8KZM5_9PSED   | RGYTGG--LIG-----                                               | -----FTSGTG----DMLDLVRAHSA-       |     |
| SACTE_5458     | RGYTAG--VIG-----                                               | -----FCSGTG----DMLKVVRYTA-        |     |
| Amir_4331      | RGYTAG--IIG-----                                               | -----FCSGTG----DMLDLVEAYTS-       |     |
| Sros_2053      | RGYTAG--IIG-----                                               | -----FCSGTG----DMLDLVELYAE-       |     |
| SCO0677        | RGYTAG--IIG-----                                               | -----FCSGTG----DMLDLVELYGE-       |     |
| C9E0E7_STRLI   | RGYTAG--IIG-----                                               | -----FCSGTG----DMLDLVELYGO-       |     |
| SACTE_5457     | 94 rgyttag--iig-----                                           | -----fcsqtg----dmlslverytd-       | 119 |
| SAV_2015       | RGYTAG--IIG-----                                               | -----FCSGTG----DMLDLVELYTD-       |     |
| SAMR0713       | RGYTAG--IIG-----                                               | -----FCSGTG----DMLDLVELYTA-       |     |
| BN159_0876     | rgyttag--iig-----                                              | -----fcsqtg----dmlslverytd-       |     |
| RSa133209_3139 | RGYTGG--IIG-----                                               | -----FTSGTG----DMLDLVQNYAN-       |     |
| AORI_1736      | RGYTAG--IIG-----                                               | -----FCSGTG----DMLDLVERYTN-       |     |
| SBI_02563      | RGYTAG--IIG-----                                               | -----FCSGTG----DMLDLVEYYTQ-       |     |
| AMED_6991      | RGYTAG--IIG-----                                               | -----FCSGTG----DMLDLVEAYTN-       |     |
| CsnN106        | RGYTAG--IIG-----                                               | -----FCSGTG----DMLDLVADYTD-       |     |
| CsnN174        | 42 RGYTGG--IIG-----                                            | -----FCSGTG----DMLDLVQHYTD        | 67  |
| Cho_AmyCSO-2   | RGYTAG--IIG-----                                               | -----FCSGTG----DMLDLVQHYTD-       |     |
| KSE_15150_csn1 | RGYTGG--IIG-----                                               | -----FCSGTG----DMLDLVQHYTD-       |     |
| KSE_40930_csn3 | RGVTAG--RAG-----                                               | -----FTTNDG----DALKVVRAYTE-       |     |
| KUTG_00281     | RGVTAG--RAG-----                                               | -----YTTNDG----DALRVIQAYTD-       |     |
| Q9RC18_BacKFB  | RPSTCG--PAG-----                                               | -----VTTATR----DGFEVVPVYKQ-       |     |
| BAMF_3066      | RGYTCCG--RAG-----                                              | -----FTTATG----DALEVVEVYTK-       |     |
| Q9ET84_BACAM   | RGYTCCG--RAG-----                                              | -----FTTATG----DALEVVEVYTK-       |     |
| RBAM_029740    | RGYTCCG--RAG-----                                              | -----FTTATG----DALEVVEVYTK-       |     |
| A0EQW7_9BACI   | RGYTCCG--RAG-----                                              | -----FTTATG----DALEVVEVYTK-       |     |
| D0FHB6_BACIU   | RGYTCCG--RAG-----                                              | -----FTTATG----DALEVVEVYTK-       |     |
| BSNT_03901     | RGYTCCG--RAG-----                                              | -----FTTATG----DALEVVEVYTK-       |     |
| BSU26890       | RGYTCCG--RAG-----                                              | -----FTTATG----DALEVVEVYTK-       |     |
| Q0PVM7_BACAM   | RGYTCCG--RAG-----                                              | -----FTTATG----DALEVVEVYTK-       |     |
| BATR1942_06760 | RGYTCCG--RAG-----                                              | -----FTTATG----DALEVVEVYTK-       |     |

Figure S2. Cont.







Npun\_R2009 IEKVH-AIANDQKWWKAQWDAYISTYWQPTLKLKSK-----NYMKALTIGVLIDT  
RBRH\_02856 CSKVK-AQQNPTWREAMWRTFYNDIQYSVQQARQR-----GFDSALTIGSFVDT  
PPSC2\_c3877 KKKIK-ALQNNPRAWREAWRTFYDITYEYSVQQARKR-----GFNTALTIGSFVDT  
CV\_3931 CDKIG-SLQNNPAWRDAMWNTFYKVYIQYSVQQARQR-----GFSSALTIGSFVDT  
Q2PWA1\_9BACL CRKIG-NLQDDPEWREAMWRTFYNYIYKYRGEQARNR-----GFNSALTIGSFVDT  
Q9XDS6\_BURGA CGKVK-GLQNDAAWREAMWRTFYSVYIQYSVQQARSR-----GFGSALTIGSFVDT  
CHIS\_BACCI 124 CGKIK-KLQNDAAWRKAMWETFYNYIYRYSVEQARQR-----GFTSALTIGSFVDT 173  
O24825\_9BACL CGKIK-KLQNDPAWRKAMWETFYNYIYRYSVEQARQR-----GFTSALTIGSFVDT  
A7K8G4\_9PHYC GRDI-KSLGDDKEWQAVVDIYIKLYWNFARNFSDKLD---INRPGAKLTSPLTRGFMVDT  
A7RBE5\_PBCVA GKVI-NVLGDDKEWQEAWEIYIKLYWTFATDFADKKNSAKNRPGAVLTSPLTRGFMIDV  
Q84608\_PBCV1 GKVI-NGLGDDKEWQTAVWDIYVKLYWTFADDFSDKTGSAKNRPGPVMTSPLTRGFMVDV  
O12288\_9PHYC GKVI-NGLGDDKEWQTAVWDIYVKLYWTFADDFSDKTGSAKNRPGPVMTSPLTRGFMVDV  
Hoch\_2166 LSALR-AAGSEQIMQDAQNAFFSEDFWVPAVKAALNH-----GITSALGYATLYDA  
STAUR\_1941 TRIWENNT--PSLDVTLQAASHGALPYEAAMSEAKKW-----GLTTALSKAALYDA  
A4KCU0\_9ENTR KDLLRRAGRDDPIMKSVQDRFFDERYYLPALKWAQDF-----GFKDALSLLVYDYS  
Play\_0939 RNLL-KEAGADPVMRDTQDAFFDRVYWPAAASAIRL-----GLTEALSIAIVYDS  
Tmz1t\_3574 HNVL-RATADDPVMRDTQDAFFDRTYWEPALRAAASL-----GVHTPLGVAVVYDS  
CJA\_3747 KNIL-RATADDHIMRETQDLFFDQAYWQPAERAATQL-----GIKTPLGVAVVYDS  
Daro\_2852 HNLL-RATADDPVMRETQDLFFDEVYWQPAAKAADNF-----GIKSALGVAVVYDS  
Cho4239-1\_Jan vsdwqkaa-qdpvfqqsqntlrdnayfnpavslakqd-----glr-tlgqfiyyda  
SCO2024 TAAWKAEA-EVPAFRAAQEAERDRVYFPAVRLAKLD-----GLG-TLGQFVYYDA  
BN159\_6425 paawkaea-kkpafraaqdeerdevyfnpavrlakld-----glg-tlgqfvyyyda  
SACTE\_5886 TRAWREAA-EDETFRSAQDRLRDLRYFDPAVRLAKLD-----GLG-TLGQFVYYDA  
KSE\_40860\_csn2 PAAWKQAA-TDPVFTQTQESERDRVYFNPAVAQAKKD-----GLR-ALGQFAYYDA  
BN159\_0394 enawrtaa-qdsvftktqeeerdrvyfnpavqgakt-----glk-algqfayyyda  
Csn\_StrAM-7161 TNAWRQAA-QDVFQQTQEEERDRVYFPAVSQAKQD-----GLR-ALGQFAYYDA  
SAV\_6191 taawraea-gvaafraaqdaerdrvyfdpavrlarhd-----glg-algqfiyyda  
E1AXU1\_9PSED 101 EQAWADAA-ETSEFRAAQDAERDRVYFDPAVAQGGKAD-----GLS-ALGQFAYYDT 149  
Q8KZM5\_9PSED EQAWADAA-ETSEFRAAQDAERDRVYFDPAVAQGGKAD-----GLS-ALGQFAYYDT  
SACTE\_5458 TEAWARVA-DDTAFRAAQDAERDETYFDPAVARAEAD-----GLS-ALGQFVYYDA  
Amir\_4331 QQAWRTAA-QDPVFQQAQETERDRVYFTPSVNQAKSD-----GLR-ALGQFAYYDA  
Sros\_2053 TKDWATAA-KDKVFQQAQNDERDRVYFNPAVQAKKD-----GLR-ALGQFAYYDA  
SCO0677 PDDWRRADQDPQFRRAQDDERDRVYFDPAVRRGKED-----GLR-TLGQFAYYDA  
C9E0E7\_STRLI PDDWRRADQDPQFRRAQDDERDRVYFDPAVRRGKED-----GLR-TLGQFAYYDA  
SACTE\_5457 150 prdwaeaa-kdpvfqqaqnderdrvyfdpavrqqakd-----glg-tlgqfayyyda 198  
SAV\_2015 PGDWRRAA-QDSAFQQAQNDERDRVYFDPAVRQGGKAD-----GLS-VLQGFYYDA  
SAMR0713 PGDWQRAA-GDPEFRAAQDDERDRVYFPAVRQAQAD-----GLR-TLGQFAYYDA  
BN159\_0876 prdwrraa-qdrafqqaqnderdrvyfdpavrqqkad-----glr-algqfayyyda  
RSa133209\_3139 VDAWHQAA-KDSVFLKEQDKLRDSMYFNPAVSQGGKSD-----GLS-NLQGFMYDA  
AORI\_1736 ENAWREAA-GREDFKAAQNSERDRVYFDPAVNQAKSD-----GLG-ALGQFIYYDA  
SBI\_02563 TKDWKAAA-EDKAFQDAQEHERDRVYFNPSVSQGGKAD-----GIG-TLGQFIYYDA  
AMED\_6991 ESAWKQAA-ATTAFTAQNNERDRVYFNPSVNQGGKAD-----GLS-NLQGFAYYDA  
CsnN106 EKDWATAA-KDSVFQQAQNDERDRVYFNPAVNQAKA-----SLR-ALGQFAYYDA  
CsnN174 98 TKDWATAA-KD TVFQQAQNDERDRVYFDPAVSQAKAD-----GLR-ALGQFAYYDA 146  
Cho\_AmyCSO-2 VNDWRATAA-KD TVFQQAQNDERDRVYFNPAVKQAKAE-----RLR-ALGQFVYYDA  
KSE\_15150\_csn1 VNDWKATAA-KD TVFQQAQNDERDRVYFNPAVKQAKAD-----GLR-ALGQFAYYDA  
KSE\_40930\_csn3 VTAWKRAA-DDPAFRRVQDAQVDERYFAPAMADADRL-----GLTTALARAEFLDA  
KUTG\_00281 IAAWRQAA-DDPAFRRVQDDQVEQNYFTPAMAAADRL-----GLITPLARAEYDA  
Q9RC18\_BacKFB ASAWKSLA-DDKAFRAAQDGVNDQVYYPAMERSDNA-----GLTTALARAVMYHT  
BAMF\_3066 ASAWRSLG-NDKAFRAAQDEVNDRLYYQAMKRSDQA-----GLKTALAKAVMYDT  
Q9ET84\_BACAM ASAWRSLG-NDKAFRAAQDKVNDSLYYPAMKRSENA-----GLKTALAKAVMYDT  
RBAM\_029740 ASAWRSLG-NDKAFRAAQDKVNDSLYYPAMKRSENA-----GLKTALAKAVMYDT  
A0EQW7\_9BACI ASAWRSLG-NDKAFRAAQDKVNDSLYYPAMKRSENA-----GLKTALAKAVMYDT  
D0FHB6\_BACIU ASAWKSLA-NDKEFRAAQDKVNDHLYYQAMKRSDNA-----GLKTALARAVMYDT  
BSNT\_03901 ASAWKSLA-NDKEFRAAQDKVNDHLYYQAMKRSDNA-----GLKTALARAVMYDT  
BSU26890 ASAWKSLA-NDKEFRAAQDKVNDHLYYQAMKRSDNA-----GLKTALARAVMYDT  
Q0PVM7\_BACAM DSAWRSLG-KDKDFRAAQDVTNDRLYYQAMKQSDNI-----GLKTALAKAVMYDT  
BATR1942\_06760 DSAWRSLG-NDKDFRAAQDAVNDRLYYQAMKRSENA-----GLKTALARAVMYDT

Figure S2. Cont.



|                |                             |                                           |                             |                            |     |
|----------------|-----------------------------|-------------------------------------------|-----------------------------|----------------------------|-----|
| Npun_R2009     | AMNAGMEDDN----              | SENWGV EHLFTEA-----                       | SDDTDNEEDFVDRFMELRLQFP      |                            |     |
| RBRH_02856     | ALNQGADGGG----              | DSLKAL----LAR-----                        | SGDSPNEKTFMTRFYAERAKVV      |                            |     |
| PPSC2_c3877    | ALNQGATGDD----              | GSLEGV----LSR-----                        | SGNSTNEKTFMTNIFYAKRTL       |                            |     |
| CV_3931        | ALNQGATGDS----              | GTLQGL----LSR-----                        | SGNSGDEKTFMTAFYAQRSKIV      |                            |     |
| Q2PWA1_9BACL   | ALNHGATGGS----              | ESLQGL----LSK-----                        | SGSSTDEKTFMTKFKYKERTKIV     |                            |     |
| Q9XDS6_BURGA   | ALNQGADGGS----              | NTLQGL----LSR-----                        | SGNSTDEKTFMTSFYAQRTKVV      |                            |     |
| CHIS_BACCI     | 174                         | ALNQGATGGS----                            | DTLQGL----LAR-----          | SGSSSNEKTFMKNFHAKRTL       | 214 |
| 024825_9BACL   | ALNQGATGDS----              | NTLQGL----LAR-----                        | SGSSTNEKTFMKNFHAKRTL        |                            |     |
| A7K8G4_9PHYC   | ALNHGADL-----               | DSFGPILKGMNKN-----                        | DEQDEATWFLDFCESRRKLL        |                            |     |
| A7RBE5_PBCVA   | ALNHGANM-----               | ESFEPILKNMKNR-----                        | EKDEAKWFLDFCEARRKLL         |                            |     |
| Q84608_PBCV1   | ALNHGSNM-----               | ESFSDILKRMKNR-----                        | EKDEAKWFLDFCETRRKLL         |                            |     |
| O12288_9PHYC   | ALNHGSNM-----               | ESFSDILKRMKNK-----                        | DEKDEAKWFLDFCETRRKLL        |                            |     |
| Hoch_2166      | KIQGGMEDSLQRATSAMGGIVGATVER |                                           | NGRSQQVTEAEFLVAFNEAREGR     |                            |     |
| STAU_1941      | FIQHGEAGV-----              | RELLQTHASLGVSQAAPAVGPQGLSEDAWLRGLFLEQRTDL |                             |                            |     |
| A4KCU0_9ENTR   | FVH-----                    | SGTILTLFLRAQFR-----                       | E-VPPASGGDEHTWISQYVEVRNSWL  |                            |     |
| Plav_0939      | VVH-----                    | GSWISLRDRTL-A-----                        | K-AGQPSKAGERAWSLAYVRERRNWL  |                            |     |
| Tmz1t_3574     | AVH-----                    | GSWLAMRDRTT-R-----                        | A-VGEPAAVGEQAWIDAYVTRRAWL   |                            |     |
| CJA_3747       | TVH-----                    | GSAKLIRDKTN-Q-----                        | S-AGTLASLGEQKWIEAYVATRRYWL  |                            |     |
| Daro_2852      | WVH-----                    | GSWKTLLRDMTN-Q-----                       | K-SGPIATLGERAWIKAYVETRRSWL  |                            |     |
| Cho4239-1_Jan  | ivmhgpgtdsqr--              | nsfqgnspqalkk-----                        | a-lppskggnetaaylnafldvrralm |                            |     |
| SCO2024        | MVFGHPDTPD--                | A-EGFYGLRERAMAE-----                      | A-RTPGQGGSEKAYLETFLDVRKQAM  |                            |     |
| BN159_6425     | mvlhgpdps--                 | a-ngfyglreralhe-----                      | a-rlpsrggsekayldifldlreqam  |                            |     |
| SACTE_5886     | MVLHGPVE--                  | A-NGFYGIRDAAMAQ-----                      | A-DTAAEGGDEATAYLDAFLDAGR    |                            |     |
| KSE_40860_csn2 | AVMHGP-----                 | DGLASIRSAALAK-----                        | A-KPPAQGGNETTWLNAFLDAREAM   |                            |     |
| BN159_0394     | avmhge-----                 | egfrairsravsr-----                        | v-kppsqqgnevtfllhafldereem  |                            |     |
| Csn_StrAM-7161 | AVMHGE-----                 | SGFRDIRSVALSR-----                        | A-LPPSRGGDEKAYLKAFLDAREEM   |                            |     |
| SAV_6191       | mvvhgpgtd--                 | p-hslqgiraralre-----                      | a-dtpaeggsetryldafldvrrtvm  |                            |     |
| E1AXU1_9PSED   | 150                         | LVVHGPQSQ--                               | R-DAFGGIRAEALSA-----        | A-LPPSQGGDETEYLEAFFDARNVIM | 197 |
| Q8KZM5_9PSED   | LVVHGPQSQ--                 | R-DAFGGIRAEALSA-----                      | A-LPPSQGGDETEYLEAFFDARNVIM  |                            |     |
| SACTE_5458     | FVMHGYADAKGT--              | VGFRGIRAEAVEA-----                        | A-DPPSRGGDEEAYLDAFLDARVRAI  |                            |     |
| Amir_4331      | IVMHGGGTD--                 | Q-ASFGTIRRKAMAR-----                      | A-KTPAQGGDEATAYLHAFLDERVVAM |                            |     |
| Sros_2053      | IVMHGDGGD--                 | P-ESFSSIRRNALKK-----                      | A-KPPAQGGDEVKYLHAFLDARKVAM  |                            |     |
| SCO0677        | MVMHGDGG--                  | G-LGFGSIRERALGR-----                      | A-RPPAQGGDEVAYLHAFLDERVVAM  |                            |     |
| C9E0E7_STRLI   | MVMHGDGG--                  | G-LGFGSIRERALGR-----                      | A-RPPAQGGDEVAYLHAFLDERVVAM  |                            |     |
| SACTE_5457     | 199                         | ivmhggggd--                               | s-tsfgsirgralae-----        | a-eppsrggdevayldafldarvwam | 246 |
| SAV_2015       | IVMHGDGGD--                 | S-TSFGSIRGRALAK-----                      | A-EPPAQGGNEVTYLNAFLDARVVAM  |                            |     |
| SAMR0713       | IVMHGGGGD--                 | R-LGFGSIRERALGR-----                      | A-RPPAQGGDEVAYLDAFLDARVVAM  |                            |     |
| BN159_0876     | ivmhgggsd--                 | r-lsfgsirrralqs-----                      | a-rppaqggdevrylhafldarvwam  |                            |     |
| RSa133209_3139 | IFMHGPGDS--                 | S-DSFGGIRKSAMKN-----                      | A-KTPAQGGDEKTYLQAFATARKKIM  |                            |     |
| AORI_1736      | IVMHGPGTS--                 | Q-DSFGGIRSAALQQ-----                      | A-KPPAQGGDEATAYLKAFLDARRVVM |                            |     |
| SBI_02563      | IVMHGPGDS--                 | K-YSGFGIRKTAMSK-----                      | A-KTPAQGGDEKTYLNAFLDARKKAM  |                            |     |
| AMED_6991      | IVMHGPGDS--                 | S-DSFGGIRKAAMKK-----                      | A-KTPAQGGDEATYKAFFAARKVIM   |                            |     |
| CsnN106        | IVMHGPGDS--                 | S-DSFGGIRKAAMKK-----                      | A-KTPAQGRDEATYKAFLAARKTVM   |                            |     |
| CsnN174        | 147                         | IVMHGPGND--                               | P-TSFGGIRKTAMKK-----        | A-RTPAQGGDETTYLNAFLDARKAAM | 194 |
| Cho_AmyCSO-2   | IVMHGPGSS--                 | S-DSFGGIRAAAMKK-----                      | A-KTPAQGGDEATYLNFLDARKVIM   |                            |     |
| KSE_15150_csn1 | IVMHGPGTS--                 | A-DSFGGIRAAALKK-----                      | A-KTPAQGGDEATYKAFLDARKVVM   |                            |     |
| KSE_40930_csn3 | SVQHNGNSE--                 | Y-DALPALIARTSAK-----                      | AGTPAAA--GEDAWLDAFFDVRIDDL  |                            |     |
| KUTG_00281     | AIQHGHDGAD--                | P-DGLPALIDRATAR-----                      | AGK---V--DEAAWLTAFLDVRADDL  |                            |     |
| Q9RC18_BacKFB  | VRQRGDGDD--                 | G-DSRYALIKRTPKG-----                      | AGGSPKEGIDEQKCLNKFSHVRYDDL  |                            |     |
| BAMF_3066      | VIQHDGDD--                  | P-DSFYALIKRTNKK-----                      | MGGSPKDGIDEKKWLNKFLDVRYYDDL |                            |     |
| Q9ET84_BACAM   | VIQHDGDD--                  | P-DSFYALIKRTNKK-----                      | MGGSPKDGIDEKKWLNKFLDVRYYDDL |                            |     |
| RBAM_029740    | VIQHDGDD--                  | P-DSFYALIKRTNKK-----                      | MGGSPKDGIDEKKWLNKFLDVRYYDDL |                            |     |
| AOEQW7_9BACI   | VIQHDGDD--                  | P-DSFYALIKRTNKK-----                      | MGGSPKDGIDEKKWLNKFLDVRYYDDL |                            |     |
| DOFHB6_BACIU   | VIQHDGDD--                  | P-DSFYALIKRTNKK-----                      | AGGSPKDGIDEKKWLNKFLDVRYYDDL |                            |     |
| BSNT_03901     | VIQHDGDD--                  | P-DSFYALIKRTNKK-----                      | AGGSPKDGIDEKKWLNKFLDVRYYDDL |                            |     |
| BSU26890       | VIQHDGDD--                  | P-DSFYALIKRTNKK-----                      | AGGSPKDGIDEKKWLNKFLDVRYYDDL |                            |     |
| QOPVM7_BACAM   | IIQHGGGDD--                 | P-DSLNSLIKRTNKK-----                      | AGGSPKNGVDEKKWLNKFLDVRYYDDL |                            |     |
| BATR1942_06760 | VIQHDGDD--                  | P-DSFYSLIKRTNKK-----                      | AGGSPKDGIDEKKWLNKFLDVRYYDDL |                            |     |

\* :

Figure S2. Cont.



|                |                       |                        |                         |                      |     |
|----------------|-----------------------|------------------------|-------------------------|----------------------|-----|
| Npun_R2009     | TR----                | DS-----                | GDMEERIG-AWQKLLRDRKWD   | MRVDLKNYVYIPQ-----   |     |
| RBRH_02856     | DTHDYNTS-----         | PNGKNRVK-QWSKLMDOGETDL | KNADAAIVKVTNWQLH----    |                      |     |
| PPSC2_c3877    | DTNDYNQP-----         | PNGKNRVK-QWSSLLASGETDL | KNADVAIKVTNWEMK----     |                      |     |
| CV_3931        | DTNDYNQP-----         | PNGKNRVK-QWSTLLNMGETDL | KNADAAVQKVTNWEMK----    |                      |     |
| Q2PWA1_9BACL   | DTNEYNSP-----         | PNGKNRVK-QWSNLLNMGETDL | KNADSAVLQVTDWELQ----    |                      |     |
| Q9XDS6_BURGA   | 215 DTHDFNQP-----     | PNGKNRVK-QWSTLMSQGITSL | KNCDADIVKVTSWTMK----    |                      | 259 |
| CHIS_BACCI     | DTNEYNQP-----         | PNGKNRVK-QWDTLVDMGKM   | NLKNVDSEIAQVTDWEMK----  |                      |     |
| O24825_9BACL   | KRGFQDLDTSKT-----     | GDRC-TLWANI FKSGNTSLTR | -PIKC-----YRGYWGN       |                      |     |
| A7K8G4_9PHYC   | KSGFQQDLDTSKT-----    | GDRC-TLWANI FKSGNVGLKR | -PIQC-----FDGYWGK       |                      |     |
| A7RBE5_PBCVA   | KAGFQDLDTSKT-----     | GDRC-TLWANI FKEGNVGLKR | -PIKC-----YNGYWGK       |                      |     |
| Q84608_PBCV1   | KSGFQDLDTSKT-----     | GDRA-ILWSELFKTGNVGLKR  | -PIKC-----YNGYWGK       |                      |     |
| O12288_9PHYC   | ERIAVRRDGQKRRDAEMLRNS | KVRPQ-AFEELARDGNLDLSA  | -NVDGENSLEFRTYIGGR      |                      |     |
| Hoch_2166      | AADPEG-----           | RYAIDRVA-TYEKQRRRGNW   | LLT-AVQ-----NDVRARD     |                      |     |
| STAUR_1941     | ANHSN-----            | PELHPTVYRTR-CLRFEDRGN  | WDLSQVPIIN-----ANGI---  |                      |     |
| A4KCU0_9ENTR   | AMHSN-----            | TLLRKTIRME-AFEALIAAKN  | WSLAL-PMT-----VRGI---   |                      |     |
| Plav_0939      | EGHAR-----            | ADLRQTVYRME-AFGRLIDQ   | GFWGLEM-PLV-----VRGR--- |                      |     |
| Tmz1t_3574     | ANHPR-----            | KDLRPTVYRMD-AFQRLIDL   | NLWGLEL-PLV-----VRGL--- |                      |     |
| CJA_3747       | ANHSR-----            | SDLRGTTYRMD-AFLRLIEQ   | GYWGLAL-PLV-----VHGE--- |                      |     |
| Daro_2852      | Cho4239-1_Jan         | qsepdh-----            | ag-----nldrldtqqrflq    | ngnldlnt-pln-----wkv |     |
| SCO2024        | EAKRPG-----           | ID-----TSRVDTAQR       | RFLTAGNLKLAT-PLV-----   | WEMY---              |     |
| BN159_6425     | krkkst-----           | ad-----tsrvstaqrewly   | dgnlslnt-pls-----wrm    |                      |     |
| SACTE_5886     | RARTVQ-----           | RD-----TSRIDTAQR       | VFLRDGNLELRT-PLV-----   | WRMY---              |     |
| KSE_40860_csn2 | RKEAAH-----           | SD-----TRRVSTEQR       | KFLNEGNFDLHT-PLT-----   | WSVY---              |     |
| BN159_0394     | rkeeah-----           | sd-----ttrvstaqrrfl    | negnlhlni-ply-----w     | svy---               |     |
| Csn_StrAM-7161 | RKEAAH-----           | SD-----TRRVSTAQR       | RFLNEGNLDLNT-PLH-----   | WSVY---              |     |
| SAY_6191       | kseksh-----           | hd-----ttridtaqrrfl    | lydgnldlrlt-ple-----    | wrvy---              |     |
| E1AXU1_9PSED   | 218 REEPAH-----       | AD-----TSRIDTAQR       | VFLQNGNFDLER-PLT-----   | WSVY---              | 233 |
| Q8KZM5_9PSED   | REEPAH-----           | AD-----TSRIDTAQR       | VFLQNGNFDLER-PLT-----   | WSVY---              |     |
| SACTE_5458     | RQEPSH-----           | SD-----ASRVETAQR       | VFVHEGRLQLET-PLV-----   | WKVY---              |     |
| Amir_4331      | KLEEAH-----           | ED-----TSRVDTAQR       | VFLNNGNLDLNT-PLA-----   | WKVY---              |     |
| Sros_2053      | KAEEAH-----           | ED-----TSRVDTAQR       | VFLNKGNDLNT-PLS-----    | WKVY---              |     |
| SCO0677        | KQEQAH-----           | SD-----TSRVDTAQR       | VFLNEGNLDLEP-PLD-----   | WHVY---              |     |
| C9E0E7_STRLI   | KQEEAH-----           | SD-----TSRVDTAQR       | VFLNEGNLDLEP-PLD-----   | WHVY---              |     |
| SACTE_5457     | 247 rkeeah-----       | sd-----tsrvdtaqr       | vflrdgnlndp-pld-----    | wqvy---              | 282 |
| SAV_2015       | RQEEAH-----           | SD-----TSRVDTAQR       | VFLTKGNLNDP-PLD-----    | WKVY---              |     |
| SAMR0713       | KQEEAH-----           | SD-----TSRVDTAQR       | VFLREGNLDLDP-PLD-----   | WQVY---              |     |
| BN159_0876     | kqeeah-----           | sd-----tsrvdtaqr       | vflrqgnlndp-pld-----    | wkvy---              |     |
| RSa133209_3139 | KQENAH-----           | SD-----TSRVDDAQL       | KFLNEGNLDLHT-PLK-----   | WKVY---              |     |
| AORI_1736      | KQEEAH-----           | AD-----TSRIDTAQL       | VWLNDGNLDLHT-PLK-----   | WAVY---              |     |
| SBI_02563      | QSEEPH-----           | SE-----TSRVDTAQR       | VFLNEGNLLEP-PLK-----    | WKVY---              |     |
| AMED_6991      | KQEEAH-----           | AD-----TSRVDTAQR       | VFLSEGNDLHT-PLK-----    | WKVY---              |     |
| CsnN106        | LKEEAH-----           | SD-----TSRVDTAQR       | VFLNAKNFDLNP-PLK-----   | WKVY---              |     |
| CsnN174        | 219 LTEAAH-----       | DD-----TSRVDTAQR       | VFLKGNLDLNP-PLK-----    | WKTY---              | 230 |
| Cho_AmyCSO-2   | KQEEAH-----           | AD-----TSRVDTAQR       | VFLNAKNFDLNP-PLK-----   | WKVY---              |     |
| KSE_15150_csn1 | KQEEAH-----           | AD-----TSRVDTAQR       | VFLNAKNFDLNP-PLK-----   | WKVY---              |     |
| KSE_40930_csn3 | THPANS-----           | ATQAEWSQSVDRVE-ALRRI   | ARTGNRNLGDG-PFT-----    | VTAF---              |     |
| KUTG_00281     | RNPANA-----           | DTKEEWSKSTDRVE-CFRRI   | AATGDYTLAG-PLT-----     | VTAY---              |     |
| Q9RC18_BacKFB  | MNGANH-----           | DRRDEWRESVGRVH-VLRSI   | ANQNNYNLNG-GIH-----     | VRSH---              |     |
| BAMF_3066      | MNPSDE-----           | DTQDEWRESVARVD-VFRD    | IVKAKNYNLDG-PIH-----    | VRSS---              |     |
| Q9ET84_BACAM   | MNPADE-----           | DTQDEWRESVARVD-VFRD    | IVKEKYNLNG-PIH-----     | VRSS---              |     |
| RBAM_029740    | MNPSDE-----           | DTQDEWRESVARVD-VFRD    | IVKEKYNLNG-PIH-----     | VRSS---              |     |
| A0EQW7_9BACI   | MNPSDE-----           | DTQDEWRESVARVD-VFRD    | IVKEKYNLNG-PIH-----     | VRSS---              |     |
| D0FHB6_BACIU   | MNPANH-----           | DTRDEWRESVARVD-VLRSI   | AKENNYNNG-PIH-----      | VRSN---              |     |
| BSNT_03901     | MNPANH-----           | DTRDEWRESVARVD-VLRSI   | AKENNYNNG-PIH-----      | VRSN---              |     |
| BSU26890       | MNPANH-----           | DTRDEWRESVARVD-VLRSI   | AKENNYNNG-PIH-----      | VRSN---              |     |
| Q0PVM7_BACAM   | MNPADP-----           | DTRDEWRESVARVD-VLRSI   | AKANNYNLNG-PIN-----     | VYSE---              |     |
| BATR1942_06760 | MNPSDP-----           | DTRDEWRESVARVD-VLRSI   | AKANNYNLNG-PIN-----     | VYSE---              |     |

Figure S2. Cont.



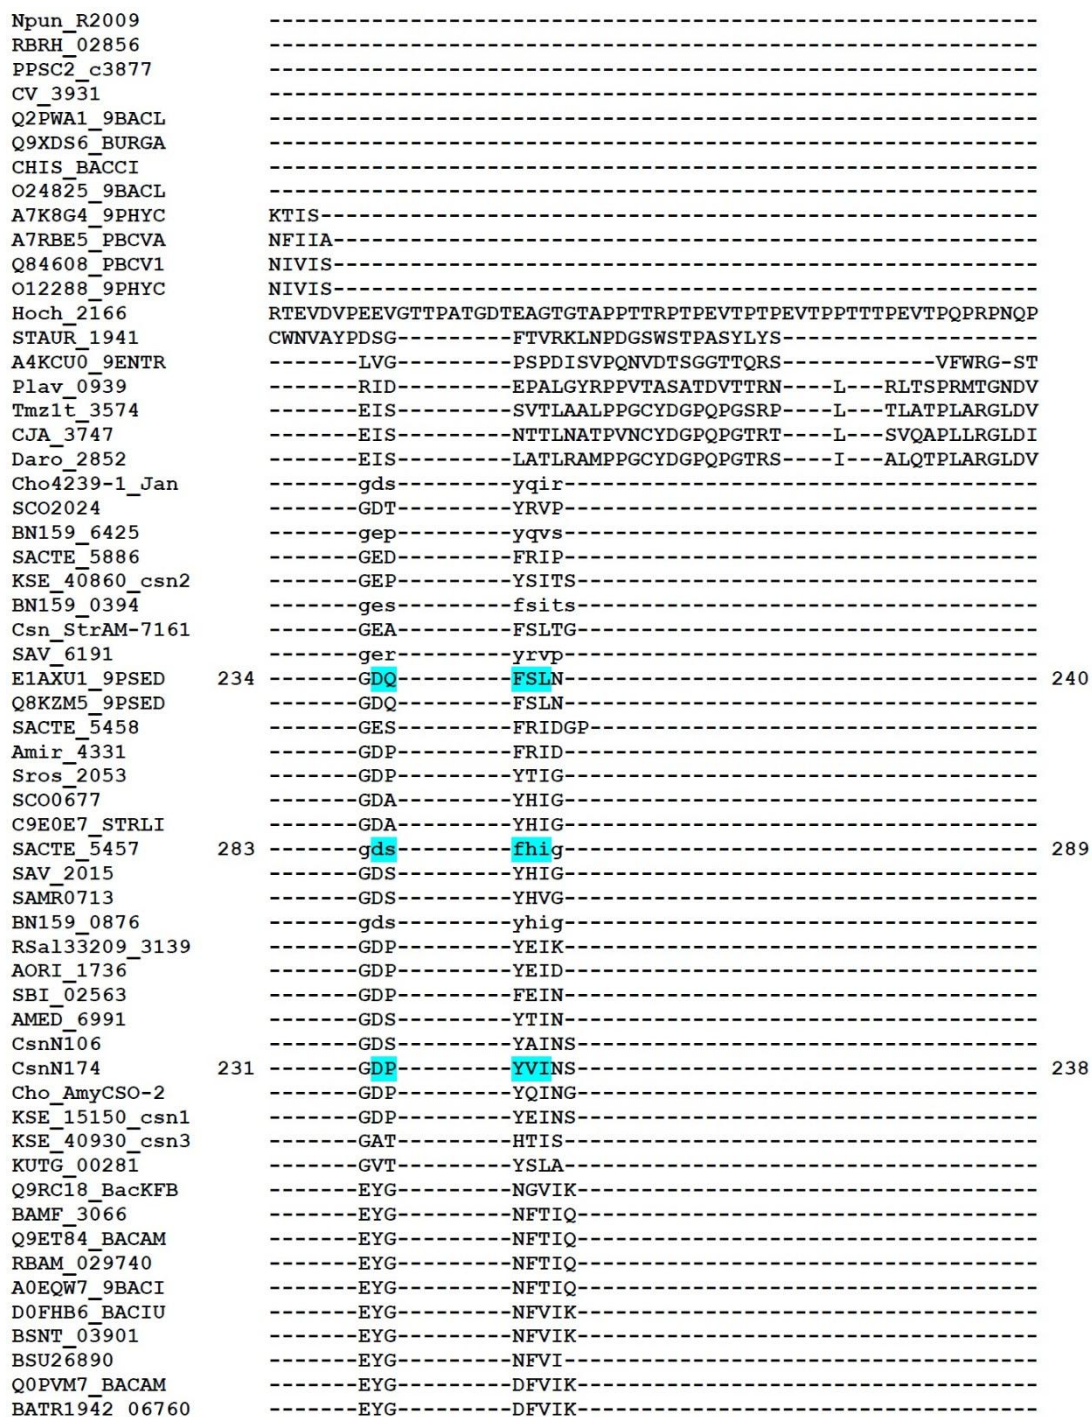

**Figure S2:** Sequence alignment obtained with Clustal Omega program after submission of FASTA-formatted sequences from which the predicted *N*-terminal signal peptides have been deleted. Residue numbering is shown for the four proteins for which 3D-structures are available. Color-coded secondary structures, derived from the respective Protein Data Bank files are also shown for these four proteins. (▼): catalytic residues.

>Amir\_4331

DGFTGFPVVLGGKCLDVAGASSANGTAVQLYTCNGTSAQSWTVDTGAKTIKALGKCLDVDDGRHDGALLQIWDCANVPEQR  
 WTVDQTRVVGQSGKCVDPAGNTADGTRLQVWTCDAWSPYQRWTTGGGTNPTTTTTSQVPGRS  
 DLATPAKDIAMRLVS  
 SAENSSLDWRAQFAYIEDIGDGRGYTAGIIGFCSGTGDMLELVEHYTSVKPNNALAGYLPALRRVNGTPSHEGLDPGFQQAW  
 RTAAQDPVFQQAQETERDRVYFTPSVNQAKSDGLRALGQFAYYDAIVMHGGGTDQASFGTIRRKAMARAKTPAQGGDE  
 TAYL  
 HAFDERVVMKLEEAHEDTSRVDTAQRVFLNNGNLDLNTPLAWKVYGD PFRID

Ricin\_B\_lectin domain;ricin-type beta-trefoil; present in chitinases and several other types of GH

> AMED\_6991

APAPLAASSASVLTGDLAPAKKEIAMKLVSSAENSSLDWKAQYKYIEDIGDGRGYTAGIIGFCSGTGDMLELVEAYTNSV  
 PNNPLAKYLPALRKVNGTASHSGLGSASFESAWKQAAATTAFOQAQNNERDRVYFNPSVNQKADGLSNLQGFAYYDAIVMHG  
 PGDSSDSFGGIRKAAMKAKTPAQGGDEATYKKAFFAARKVIMKQEEAHADTSRVDTEQAKFLSEGNDLHTPLKWKVYGD  
 S  
 YTIN

> AORI\_1736

SIFASGGDLASPEKKEIAMQIVSSAENSSLDWKAQYSYIEDIGDGRGYTAGIIGFCSGTGDMLELVERYTNSVDPNPLAEYL  
 PALREVDGTESHEGLTGFENAWREAAGREDFKAAQNSERDRVYFDPVAVQAKSDGLGALGQFIYYDAIVMHGPGTSQDSFG  
 GIRSAALQQAQPPAQGGDEATYKKAFLDARRVVMKQEEAHADTSRIDTAQLVWLNLDGNLDLHTPLKWAVYGD  
 P  
 YEID

>Cho\_AmyCSO-2

AAPAAPAAAASVSVASVGLDDPAKKEIAMELVSSAENSSLDWKAQYKYIEDIGDGRGYTAGIIGFCSGTGDMLELVQHYTDLK  
 PGNVLAKYLPALKKVNVTDSHSLGSAFVNDWRATAKDTVVFQRAQNDERDRVYFNPAVKQAKAERLRALGQFVYYDAIVMHG  
 PGSSSDSFGGIRAAAAMKAKTPAQGGDEATYLNFLDARKVIMKQEEAHADTSRVDTEQRVFLNAKNFDLNPPLKWKVYGD  
 P  
 YQING

> BAME\_3066

AGLNKDQKRRAEQLTSIFENGKTEIQYGYVEELDDGRGYTCGRAGFTTATGDALEVVEVYTKAVPNNKLLKYLPELRRLLAKD  
 ESDDISNLKGFASAWRSLGNDKAFRAAQDEVNDRLYYQPAMKRSQAGLKTALAKAVMYDTVIQHGDDPDSFYALIKRTN  
 KKMGGSPKDGTDKWKLNKFLDVRYDDLMPDSDTQDEWRESVARVDVFRDIVKAKNYNLGPIHVRSSSEYGNFTIQ

>Q0PVM7\_BACAM

AGLNKDQKRRAEQLTSIFENGMTEIQYGYVEHLDPGRGYTCGRAGFTTATGDALEVVEVYTKAVPNNKLLKYLPELRRLLAKE  
 ESDDISNLKGFDSAWRSLGKDKDFRAAQDVTNDRLYYQPAMKQSDNIGLKTALAKAVMYDTIIQHGDDPDSLNSLIKRTN  
 KKAGGSPKNGVDEKKWLNKFLDVRYDDLMPADPDTRDEWRESVARVDVLRSAKANNYNLNGPINVYSEYGFVIK

> RBAM\_029740

AGLNKDQKRRAEQLTSIFENGKTEIQYGYVEALDDGRGYTCGRAGFTTATGDALEVVEVYTKAVPNNKLLKYLPELRRLLAKD  
 ESDDISNLKGFASAWRSLGNDKAFRAAQDKVNDSLYYQPAMKRSNENAGLKTALAKAVMYDTVIQHGDDPDSFYALIKRTN  
 KKMGGSPKDGTDKWKLNKFLDVRYDDLMPDSDTQDEWRESVARVDVFRDIVKEKNYNLGPIHVRSSSEYGNFTIQ

>Q9ET84\_BACAM

AGLNKDQKRRAEQLTSIFENGKTEIQYGYVEALDDGRGYTCGRAGFTTATGDALEVVEVYTKAVPNNKLLKYLPELRRLLAKD  
 ESDDISNLKGFASAWRSLGNDKAFRAAQDKVNDSLYYQPAMKRSNENAGLKTALAKAVMYDTVIQHGDDPDSFYALIKRTN  
 KKMGGSPKDGTDKWKLNKFLDVRYDDLMPADED TQDEWRESVARVDVFRDIVKEKNYNLGPIHVRSSSEYGNFTIQ

Figure S3. Cont.

> BATR1942\_06760

AGLNKDQKRRAEQLTSIFENGMTEIQYGYVEHLPDGRGYTCGRAGFTTATGDALEVVEVYTKAVPNNKPKYLPELRRLAKE  
ESDDISNLKGFSAWRS LGNDKDFRAAQDAVNDRLYYQPAMKRSENAGLKTALAKAVMYD'TVIQHGDGDDPDSFYSLIKRTN  
KKAGGSPKDGIDEKKWLNKFLDVRYDDLMPSPDPTREWRESVARVDVLRSAKANNYNLNGPINVYSEEYGFVIK

>CHIS\_BACCI

ASPDDNFSPETLQFLRNNTGLDGEQWNNIMKLINKPEQDDLNIWIKYYGYCEDIEDERGYTIGLFGATTGGSRDTHPDGPDFL  
KAYDAAKGASNP SADGALKRLGINGKMGSI LEIKDSEKVF CGKIKKLQNDAAWRKAMWETFYNVYIRYSVEQARQGF TSA  
VTIGSFVDTALNQGATGGSDTLQGLLARS GSSSNEKT'FMKNFHAKRTL'LVDTNKYNKPPNGKNRVKQWDTLVDMGKMN LKNV  
DSEIAQVTDWEMK

>A0EQW7\_9BACI

AGLNKDQKRRAEQLTSIFENKTEIQYGYVEALDDGRGYTCGRAGFTTATGDALEVVEVYTKAVPNNKPKYLPELRRLAKD  
ESDDISNLKGFASAWRS LGNDKAFRAAQDKVND'SLYYQPAMKRSENAGLKTALAKAVMYD'TVIQHGDGDDPDSFYALIKRTN  
KKMGGSPKDGTD EKKWLNKFLDVRYDDLMP SDED'TQDEWRESVARVDVFRDIVKEKNYNLNGPIHVR SSEYGNFTIQ

>Q9RC18\_BacKFB

AGLNKDQKRRAEQLRRICEDGTTEMRYPYVARLDDARPSTCGPAGVTTATRDGFEVVPVYKQAVANKKLPNYLAGLRLEKE  
ASDDTSKLGFPASAWKSLADDKAFRAAQDGVNDQVYYQPAMERSDNAGLTTALARAVMYHTVQRQGDGDDGDSRYALIKRTP  
KGAGGSPKEGIDEQKCLNKFSHVRYDDL MNGANHDRRDEWRESVGRVHVLRSIANQNNYNLNGGIHVR SHEYGNVVIK

>D0FHB6\_BACIU

AGLNKDQKRRAEQLTSIFENGTTEIQYGYVERLDDGRGYTCGRAGFTTATGDALEVVEVYTKAVPNNKPKYLPELRRLAKE  
ESDDTSNLKGFASAWKSLANDKEFRAAQDKVNDHLYYQPAMKRSDNAGLKTALARAVMYD'TVIQHGDGDDPDSFYALIKRTN  
KKAGGSPKDGIDEKKWLNKFLDVRYDDLMPANHDTREWRESVARVDVLRSAKENNYNLNGPIHVR SNEYGNFVIK

>BSNT\_03901

AGLNKDQKRRAEQLTSIFENGTTEIQYGYVERLDDGRGYTCGRAGFTTATGDALEVVEVYTKAVPNNKPKYLPELRRLAKE  
ESDDTSNLKGFASAWKSLANDKEFRAAQDKVNDHLYYQPAMKRSDNAGLKTALARAVMYD'TVIQHGDGDDPDSFYALIKRTN  
KKAGGSPKDGIDEKKWLNKFLDVRYDDLMPANHDTREWRESVARVDVLRSAKENNYNLNGPIHVR SNEYGNFVIK

>BSU26890

AGLNKDQKRRAEQLTSIFENGTTEIQYGYVERLDDGRGYTCGRAGFTTATGDALEVVEVYTKAVPNNKPKYLPELRRLAKE  
ESDDTSNLKGFASAWKSLANDKEFRAAQDKVNDHLYYQPAMKRSDNAGLKTALARAVMYD'TVIQHGDGDDPDSFYALIKRTN  
KKAGGSPKDGIDEKKWLNKFLDVRYDDLMPANHDTREWRESVARVDVLRSAKENNYNLNGPIHVR SNEYGNFVI

>Q9XDS6\_BURGA

MATLPLAAADASARTVHAARAPQAAAAAASPEICSSPWTAARIYEAGNVVSFDGHDYTAAYRSQGNAPATASGEAGSGQPWV  
AGEACKPAKLSKAALDHDANFSPATLQFLKDNTGLDGEQWDNIMKLVNKPEQDSDLWTKFYGYCEDIGDDRGYTMGIFGATT  
GGPNDGGPDGPALFKAYDAASGASNP SVQGGLARIGAHGSMQGSILKITDSEKVF CGKVKGLQNDAAWREAMWRTFY SVYIQ  
YSVQQARSRGFGSALTIGSFVDTALNQGADGGSNTLQGLLSRSGNSTDEKT'FMTSFYAQR'TKVVD'THDFNQPPNGKNRVKQW  
STLMSQGITS LKNCDADIVKVT SWTMK

ChtBD3 superfamily domain; found in chitinases; discovered in ChiC of *Streptomyces griseus*

Figure S3. Cont.

>RBRH\_02856

DDAQPNSEPCDAPWDAKTIYQGGEVVS YAGRNYTAA YWTQGNAPDLNSGDGNTGQPWRVGT CNAVANVASGNPDANFSPAT  
LQFLKKN TGLDGEQWNNIMKLINKPEQDSLQWTKYGYCQNIHDDRGTITIGIFGATTGGSNDTGPDPGPELFKTFDALSGAKI  
PSAEGGLTRIGAHGKMSG SILKISDSSKTFCSKVKAQQNNPTWREAMWRFTFYNVDIQYSVQQARQGRGFSALTIGSFVDTAL  
NQGADGGGDSLKALLARSGDSPNEKTFMTRFYAERAKVVDTHDYNTSPNGKNRVKQWSKLMDOGETDLKNADAAIVKVTNWQ  
LH

ChtBD3 superfamily domain; found in chitinases; discovered in ChiC of *Streptomyces griseus*

>CJA\_3747

MLTPTQKKTAEAI VNI FETG SVLGDYSNVTLITGDTGHLTFGRSQTTLGSGNLGKLLQLYCANPGARFRQQLTPFLARFAAR  
DFSLDHEEHLKNI LRATAD DHIMRETQDLFFDQAYWQPAERAATQLGIKTP LGVAVVYDSTVHGS AKLIRDKTNQSAGTLAS  
LGEQKWIEAYVATRRYWL ANHPRKDLRPTVYRMDAFQRLIDLNLWGLELPLVVRGLEISNTTLNATPVNICYDGPQPGTRTLS  
VQAPLLRGLDIRLVQLGLSKSGINLRADGIFGNGSVSAVKTFQTKQNL PATGIVDNALIAKLVS

C-terminal extension: PG\_binding\_1 domain; Putative peptidoglycan binding domain. This domain is composed of three alpha helices. This domain is found at the N or C terminus of a variety of enzymes involved in bacterial cell wall degradation.

>CV\_3931

QGSTAGSPERQTVRLPDCAAWS PASPYQAGSVASRGGVNYTAAFWTQGNPPEQGOAWQAGKRCRPAQAQAKAADHDANFPPA  
TLKFLKANTGLDGEQWNIKLVNKPEQDSLEWTKFYGYCENIGDKRGYITIGIFGATTGGPNDEGPDGPTLFKEFDASSGAS  
NPSIAGGLARAGVHGSMQ GKILKISDSAKVFCDKIGSLQNNPAWRDAMWNTFYKVYIQYSVQQARQGRFSSALTIGSFVDTA  
LNQGATGDSGTLQGLLSRSGNSGDEKTFMTAFYAQRSKI VDTNDYNQPPNGKNRVKQWSTLLNMGETDLKNADAAVQKVTNW  
EMK

ChtBD3 superfamily domain; found in chitinases; discovered in ChiC of *Streptomyces griseus*

>A4KCU0\_9ENTR

MILTPAQKSLCERVLNAFETGSAEGDYSAIAIFHDGPHGIRQITYGRSQTTEYSKLDLVTRYVNANGRF SADLAPFVPKIG  
NIALVDNEPFKDLLRRAGRDDPIMKSVQDRFFDERYYLPALKWAQDFGFKDALSLLVYDYSFVHSGTILTF LRAQFREVP  
SGGDEHTWISQYVEVRNSWLANHSNPELHP TVYR TKCLRFEIDRGNWDL SQVPINANGI LVGSPDISVPQNVDTSGGTTQR  
SVFWRGSTRLLWFCG

C-terminal extension of unknown function

>Daro\_2852

MSACYAEPHILQFFPSLPSTRRSWKMLTPTQKQTAQSIVNLFETGAVLGHYGNVTVIPGDTGHLTFGRSQTTLCSGNLLDLL  
QRYCGNDGARFGDKLSAWLARFEAVDLSLDDDLHLHNL LRATADDPVMRETQDLFFDEVYWQPAKAADNFGIKSALGVAVV  
YDSVWHGSKWTLRDMTNQKSGPIATLGERAWIKAYVETRRSWLANHSRSDLRGTTYRMDAFLRLIEQGYWGLALPLVHGE  
ISLATLRAMP PG CYDGPQPGTRSI ALQTPLARGLDVRLQLGMSGRGVAIKADGIFGQTSVNL LKRFQASQGLPANGIATPQ  
QLSELVD

N-terminal extension of unknown function

C-terminal extension: PG\_binding\_1 domain; Putative peptidoglycan binding domain. This domain is composed of three alpha helices. This domain is found at the N or C terminus of a variety of enzymes involved in bacterial cell wall degradation.

Figure S3. Cont.





>CsnN106

AGTVHAAPAPAGATRLAAVGLDDPHKDIAMQLVSSAENSSLDWKSQYKYIEDIKDGRGYTAGIIGFCSGTGDMLDLVADYT  
DLKPGNILAKYLPALRKVNGTESHAGLASAFEKDWATAAKDSVFQQAQNDERDRSYFNPAVNQAKASLRALGQFAYYDAIVM  
HGPGDSSDSFGGIRKAAMKKAKTPAQGRDEATYKLAFLAARKTVMLKEEAHSDTSRVDTEQTVFLNAKNFDLNPPLKWKVYG  
DSYAINS

>Npun\_R2009

MSCKIGSSYTIKPNDTLFEIAARELGDGRWREIMNPNGIPTTEEEAENLQTGQEICLPKIDEPPTQEVPGVEFFPPGTLNQ  
LNTLTGLDAQQLTNILGMINGPEQANSKWWQTVDEEIIYGYAEDIEDGRGVTIGIYGATTGKGYNDADVIWKNYGQDYSNLP  
VDEIIEKVHAIANDQKWWKAQWDAYISTYWQPTLKLKSKNYMKALTIGVLIDTAMNAGMEDDENSENWGVEHLFTEASDDTD  
NEEDFVDRFMEELRLQFPTRDSGDMEERIGAWQKLLRDRKWDMRVDLKNYVYIPQ

LysM superfamily domain; "Lysine motif" - small motif involved in peptidoglycan binding

>O24825\_9BACL

ASPDENFSPETLQFLRDRGTGLDGEQWNNIMKLINKPEQDDLNIWKYGYCEDINDERGYSIGIFGATTGGPRDTHPD  
GPELFKAYDAAKAGNPSVEGALKRLGINGKMKGSILEIKDSEKVFCEGKIKKLQNDPAWRKAMWETFYNVYIRYSVEQARQR  
GFTSALTIGSFVDTALNQGATGDSNTLQGLLARSGSSTNEKTFLLKFKHAKRTLVDVTNEYNQPPNGKNRVKQWDTLDDMGKM  
NLKNVDAEIAQVTNWEMK

>PPSC2\_c3877

LAEENGTVPQETNESNIQQIPLTSEETTSQTAVTAIDHDANFSPSTLQFLKDNTEGLDGEQWNNIMKLVNKPEQDSLKWTEFY  
GYAEDIGDDRGTIGIFGATTGGSNDTGPDPALFKAFDAASGASNPSIAGGLARAGLKGKMSGKILKLSDSDSVIKKKIKI  
LQNEAWREAMWRFTFYDYIEYSVQQARKRGFNTALTIGSFVDTALNQGATGDDGSLEGVLSRSGNSTNEKTFMTNFYAKRT  
LVVDTNDYNQPPNGKNRVKQWSSLLASGETDLKNADVAIKVTNWEMK

N-terminal domain; shared with some chemotaxis proteins and chitinases

>Q2PWA1\_9BACL

SQQKSYAAGNPDNSFFPATLNPLRDNTEGLDGEQWNNIMMLVKNKPEQDDLNIWIDFYGYCEDIDDDRGTIVLFGATTGGSNDT  
GPDGPDLEFKAYDAAKAGSNPSVKGALARIQVKGSMKKGKILEINESEESFCRIGNLQDDPEWREAMWKTFYNIYIKYRGEQA  
RNRGFNSALTIGSFVDTALNHGATGGSESLQGLLSKSGSSTDEKTFMTKFKYKERTKIVDTNEYNQPPNGKNRVKQWSNLLNM  
GETDLKNADSAVLQVTDWELQ

>Plav\_0939

MLSELQKEAAKAIVNI FETGAVRGDYARVTLLAGDSGHLTYGRAQTTLGSGNLHLLIKAYCEAPGAAYARACEPYLPRLADI  
DLRLDSDWTFRNLLKEAGADPVMRDTQDAFFDRVYWTAAAASAIRLGLTEALS LAIVYDSVVHGSWISLRDRTLAKAGQPSK  
AGERAWSLAYVRERRNWLAMHSNTLLRKT IYRMEAFEALIAAKNWSLALPMTVRGI RIDEPALGYRPPVTASATDVTTRNLR  
LTSRPMTGNDVRALEAALVKEGYAINCDGVFDEGLEKALKSFQQDYGLIADGVAGPATRIMLG

C-terminal extension: PG\_binding\_1 domain; Putative peptidoglycan binding domain. This domain is composed of three alpha helices. This domain is found at the N or C terminus of a variety of enzymes involved in bacterial cell wall degradation.

>E1AXU1\_9PSED

ETAGTVDDLDAVPQKDTAMSLVSSFENSSTDWQAQYGYLEDIADGRGYTGGLIGFTSGTGDMLELVRAHSASSPGNPLEQYIP  
ALEAVNGTGSAGLGGQFEQAWADAAETSEFRAAQDAERDRVYFDPAVAQKADGLSALGQFAYYDTLVVHG  
PGSQRDAFGGIRAEALSAAALPPSQGGDETEYLEAFFDARNVIMREEPAHADTSRIDTAQRVFLQNGNFDLERPLTWSVYGDQ  
FSLN

Figure S3. Cont.

## &gt;Q8KZM5\_9PSED

AGTVDLDAVPQKDTAMSLVSSFENSSTDWQAQYGYLEDIADGRGYTGGLIGFTSGTGMLELVRAYSASSPGNPLEQYIPAL  
EAVNGTDSHAGLGQGFQAWADAAETSEFRAAQDAERDRVYFDPAVAQKADGLSALGQFVYYDTLVVHGPGSQRDAFGGIR  
AEALSAALPPSQGGDETEYLEAFFDARNVIMREEPAHADTSRIDTAQRVFLQNGNFDLERPLTWSVYGDQFSLN

## &gt;RSa133209\_3139

GTAAQANAVSSSLAPAITAVSAASTGDLAPAKKEIAMQLVCSAENSSLDWKAQYGYIEDIDDDRGYTGGIIGFTSGTGMLE  
LVQNYANTKPDNNVLPFLPVLRLKVNKTSHEGLGQKYVDQAWHQAADSVFLKEQDKLRDSMYFNPAVSQKSDGLSNLQGF  
MYYDAIFMHGPGDSSDSFGGIRKSAMKNAKTPAQGGDEKTYLQAFATARKKIMKQENAHSDTSRVDDAQLKFLNEGNYDLHT  
PLKWKVYGDPEYK

## &gt;STaur\_1941

MTTTLFACGAGDESPGNPEAGPQELESCAYVVAASTHMGSSEWGSITFKNTGTNDIQNPQISFNVPSTGEGPSGWTRL  
QGGTTCQYTSSSHLLTIGVDTSYTFSYFTDSSSTFTATQVQVSAVRCASTADEKEGLTATQKTLAEALTRIENNTPSLDVTL  
QAASHGALPYEAMSEAKKWLTTALSKAALYDAFIQHGEAGVRELLQRTHASLVSGQAAPAVGPQGLSEDAWLRGFLEQR  
RDTLAADPEGRYAIDRVATYEQRRRGNWELLTAVQNDVRRDCWNVAYPDSGFTVRKLNPDGSWSTPASYLYSCR  
(No conserved domains detected; similarity with other GH46 due essentially to a  
segment homologous to the C-terminal part of other chitosanases)

## &gt;SAMR0713

TPARAAGLDDPAKKEIAMRLVSSAENSSLDWKAQYGYIEDIRDGRGYTAGIIGFCSGTGMMLDLVELYTARSPGNVLARHLP  
ALREVDGSDSHEGLDPGYPGDWQRAAGDPEFRAAQDDEDRVYFGPAVRQAQADGLRTLQGFAYYDAIVMHGGGGDRLGFGS  
IRDALGRARPPAGGGDEVAYLHAFLDARVWAMKQEEAHSSTSRVDTAQRVFLREGNLDLDPPLDWQVYGD SYHVG

## &gt;SAV\_6191

AATAVYLEFGLAPSDPDRTESPKPPSRQSSASAAQGLNAPAKKELAQEIVASAENSTLDWRSAYGYVEDIGDGRGYTAGVIGFC  
TGTHDLLTLVERYTKDHPGNGLARFLPALRAVDGTD SHAGLGRAFTAAWRAEAGVAAFRAAQDAERDRVYFDPAVRLARHDG  
LGALGQFIYYDAMVVHGPPTDPHSLQGIRARALREADT PAEGGSETRYLDAFLDVRRTVMKSEKSHHDTTRIDTAQRFLYD  
GNLDRTPLEWRVYGERYRVP

## &gt;SAV\_2015

APVGLDDPAKKEIAMKLVSSAENSSLDWKAQYKYIEDIGDGRGYTAGIIGFCSGTGMMLDLVELYTQRKPGNVLATYLPALR  
NVNGGDSHQGLDPGFPGDWRRAAQDSAFQQAQNDERDRVYFDPAVRQKADGIGVLGQFTYYDAIVMHGDGGDSTSFSSIRG  
RALAKAEPPAQGGNEVTYLNALFLDARVWAMRQEEAHSSTSRVDTAQRVFLTKGNLNLDPPLDWKVYGD SYHIG

## &gt;SBI\_02563

AEHTPSSAQAVKAEHRATAAVKNLDDPAKKEIAMKLVSSAENSSLDWRAQFKYIEDIDDGRGYTAGIIGFCSGTGMMLLVEY  
YTQVKPGNVLAKYLPALREVDGSDSHDGLDPNFTKDWKKAEDKAFQDAQEHERDRVYFNPSVSQKADGIGTLGQFIYYDA  
IVMHGPGDSKYSFGGIRKTAMSKAKTPAQGGDEKTYLNALFLDARKKAMQSEEPHSETSRVDTEQRKFLNEGNGLEPPLKWK  
VYGDPEIN

## &gt;SCO2024

YFAVPDDSDADPADTAAASSSSSATARSRRDDAKDRAEREREADDALIADLPPGLAAPAKKELAQQLVSSAENSTTKWRTAYG  
SIEDVGDGDGYTAGIIGFCTGTHDLLMLVERYTEDHPDNGLAEYLPALREVDGSDSHEGLDPGFATAAWKAEAEVPAFRAAQE  
AERDRVYFEPAVRLAKLDGLGLGQFVYYDAMVFHGPDTDAEGFYGLRERAMAEARTPGQGGSEKAYLETFLDVRKQAMEAK  
RPGIDTSRVDTAQRRELTAGNLKLATPLVWEMYGDYRVP  
N-terminal extension of unknown function

Figure S3. Cont.

>SCO0677

AAASARATGLDDPAKKEIAMQLVSSAENSSLDWKAQYRYIEDIGDGRGYTAGIIGFCSGTGDMMLDLVELYGERSPGNVLAPY  
LPALRRVDGSDSHEGLDPGFDDWRRADQDPQFRRAQDDERDRVYFDPVRRGKEDGLRRTLQGFAYYDAMVMHGDGGGLGF  
GSIRERALGRARPPAQGGDEVAYLHAFLDERVWAMKQEQAHS DTSRVDTAQRVFLNEGNLDLEPPLDWHVYGDAYHIG

>BN159\_0394

AGSNLALGKPV TASSVEGAGFEPAKAVD GSTSTRWASLEGV DNQW IQIDLGSVTDVAQVVLKWEAAYAKSYRVEVSDDGSTW  
RQVYSTTTGNGATDDLAVSGSGRYLRVYGTQRATAYGYSLYEVEVYGDSP TSPDPTTPPDSTTNLLAGRPTSVSSVEGTGFE  
GGKAVD GSTSTRWASVEGVDPQWLRVDMGSKTVGRVVLKWEAAYAKSYRVEVSDDGSTWRQVYSTTTGDGGTDDLAVSGSG  
RYLRVYGTQRATAYGYSLYEVEAYGTGSTTPPPSDTANLDDPAKKEIAMKLVSSFENSSLDW  
RAQFAYIEDIGDGRGYTAGIIGFCSGTGDMMLDLVERYTQKPSNPLAPYLPALREVNGTDSHAGLGT SFENAWRTAAQDSVF  
TKTQEEERDRVYFNPAVGQAKTDGLKALGQFAYYDAAVMHGEEGFRAIRSRAVSRVKPPSQGGNEVTF LHAFLDEREEEMRK  
EEAHS DTRVSTAQRFLNEGNLHLNIPLYWSVYGESFSITS

Two N-terminal F5\_F8\_C domains; discoidin domain; Cell surface-attached carbohydrate-binding domain, present in eukaryotes and assumed to have horizontally transferred to eubacterial genomes.

>BN159\_0876

VRAPGLDDPAKKEIAMKLVSSAENSSLDWKAQYKYIEDIGDGRGYTAGIIGFCSGTGDMMLDLVELYTDRSPGNVLAKYLPAL  
RAVDGTD SHAGLDPDYPRDWRRAAQDRAFQQAQNDERDRVYFDPVRRGKADGLRALGQFAYYDAIVMHGGSDRLSFGSIR  
RRALQSARPPAQGGDEVRYLHAFLDARVWAMKQEEAHS DTSRVDTAQRVFLRQGNLDLNPPLDWKVYGD SYHIG

>BN159\_6425

YFLMPTDSAESPAPPVSAQAQLAREEAKERAETERAEDEKTIASLPPGLADPAKKE LALKITATAEFSSLNWRLGYGSVEDN  
GDGCGYTAGAIGFCTGTHDLLDLVERYTETHPDNGLARYLPALRKVDGTD SHEGLDPGFPAAWKAEAKKPAFRAAQDEERDE  
VYFNPAVRLAKLDGLGTLGQFVYDAMVLHGPDPSANGFYGLRERALHEARLPSRGGSEKAYLDIF  
LDLREQAMKRKSTADTSRVSTAQREWLYDGNLSLNTPLSWRMYGEPYQVS

N-terminal extension of unknown function

>C9E0E7\_STRLI

ASARATGLDDPAKKEIAMQLVSSAENSSLDWKAQYRYIEDIGDGRGYTAGIIGFCSGTGDMMLDLVELYQORSPGNVLAPYLP  
ALRRVDGSDSHEGLDPGFDDWRRADQDPQFRRAQDDERDRVYFDPVRRGKEDGLRRTLQGFAYYDAMVMHGDGGGLGFGS  
IRERALGRARPPAQGGDEVAYLHAFLDERVWAMKQEEAHS DTSRVDTAQRVFLNEGNLDLEPPLDWHVYGDAYHIG

>Csn\_StrAM-7161

SCSPPLAGLTSATAAAVNLANRPVTTSSSTESGSGGAKAVAGSASTRWASAEGVDNQWIRIDLGSATT LGRVVLKWEAAYA  
RAYVELSDDGSTWRQIHATTTGDGGTDDLSVNGTGRYLRVFGTQRGTTPYGYSLYEVEAYGAGATTPPPSSGTGLDDPRKKE  
VAMKLVSSFENSSLDWRAQFAYIEDIDDGRGYTAGIIGFCSGTGDMLELVERYTAKKPGNPLARYLGALRAVDGTD SHEGLD  
PGFTNAWRQAAQDTVFQQTQEEERDRVYFTP AVSQAQDGLRALGQFAYYDAAVMHGESGFRDIRSVALSRALPPSRGGDEK  
AYLKAFLDAREEEMRKEEAHS DTRVSTAQRFLNEGNLDLNTPLHWSVYGEAFSLTG

F5\_F8\_C domain; discoidin domain; Cell surface-attached carbohydrate-binding domain, present in eukaryotes and assumed to have horizontally transferred to eubacterial genomes.

>CsnN174

AGAGLDDPHKKEIAMELVSSAENSSLDWKAQYKYIEDIGDGRGYTGGIIGFCSGTGDMLELVQHYTDLEPGNILAKYLPALK  
KVNGSASHSGLGTPFTKDWATAAKD TVFQQAQNDERDRVYFDP AVSQAQADGLRALGQFAYYDAIVMHGPGNDPTSF GGIRK  
TAMKKARTPAQGGDETTYLNAFLDARKAAMLTEAAHDDTSRVDTEQRVFLKAGNLDLNPPLKWKTYGDPYVINS

Figure S3. Cont.

>SACTE\_5457

GAPTQFAAHHLEAAATGLDDPAKKDIAMQLVSSAENSTLDWKAQYGYIEDIGDGRGYTAGIIGFCSGTGDMMLALVERYTDRS  
PGNVLASYL PALREVDGTDSDHGLDPGFPRDWAEAAKDPVFQQAQNDERDRVYFDPAVRQAKDDGLGTLGQFAYYDAIVMHG  
GGGDSTSFSGIRQALAEAEPPSRGGDEVAYLDAFLDARVWAMRQEEAHS DTSRVDTAQRVFLRDGN  
LNLDPPLDWQVYGDSFHIG

>SACTE\_5458

APEKGLADPAKKDIAMRLVSSAENSTLDWKAQYGYIEDIGDGRGYTAGVIGFCSGTGDMMLKVERYTAARPGNALERFLPAL  
RAVVGGDSHEGLGDAFTEAWARVADDTAFFRAQDAERDETYFDPAVARAEADGLSALGQFVYYDAFVMHGYADAKGTVGFRT  
IRAEAVEAADPPSRGGDEEAYLDAFLDARVRAIRQEP SHSDASRVETAQRVVFVHEGRLQLETPLVWKVYGESFRIDGP

>SACTE\_5886

ASILFSRGDSEPPKLTPOAAAPAPSDQEEPEAVARAEHAEIDALPPGLAAPEMKEIASRLVSSADASTLDWRSRYGAVED  
LGDNGYTAGIVGFCSTNDMLQLVEAYTEEQPDNPLAPYLPALREVDGSDSHEGLDPGFTRAWREAAEDETFRSAQDRLRD  
RLYFDPAVRLAKLDGLGTLGQFVYYDAMVLHGPGVEANGFYGIRDAAMAQADTAAEGGDETAFLDAGRTAIRARTVQR  
DTSRIDTAQRVFLRDGNLELRTPLVWRMYGEDFRIP

N-terminal extension of unknown function

>Sros\_2053

AVPAPHL SAPSQGSVTAAAADLTDPRKKDIAMQLVSSAENSSLNWKAYKYIEDIDDGRGYTAGIIGFCSGTGDMLELVELY  
AERKPGNVLAKYLPALRKVDGTD SHKGLDPNYTKDWATAAKDKVFQQAQNDERDRVYFNPAVQQA KDKGLRALGQFAYYDAI  
VMHGDGGDPESFSSIRRNALKKAKPPAQGGDEVKYLHAFDARKVAMKAEAEHEDTSRVDTAQRVFLNKGNDLNTPLSWKV  
YGDPTYIG

>Tmz1t\_3574

MERII PCTDCAEKTLDVEQLGFRVTS CDPHPERPGFCVLR FEDRSATPAAGASLAAPAAAARAGRGAVAGGVTATQAAVAKA  
IVNLEFETGEVLGQYGVKVTLIPGDTGH LTFGRSQTTLGSGNLAKLLQOYCANPGARFAGRLASYLPRFLAIDESLDDD PRLHN  
VLRATADDPVMRD TQDAFFDRTYWEPALRAAASLGVHTPLGVAVVYDSAVHGSWLMAMRDRTTRAVGEPAAVGEQAWIDAYVR  
TRRAWLEGHARADLRQTVYRMEAFGR LIDQGFWGLEMLVVRGREISSVTLAALPPGCGYDGPQPGSRPLTLATPLARGLDVR  
LLQLGLSDRGVDILADGIFGR TSNLLKAWQAQHGLAATGIADPALIGELTA

N-terminal extension of unknown function

C-terminal extension: PG\_binding\_1 domain; Putative peptidoglycan binding domain.  
This domain is composed of three alpha helices. This domain is found at the N or C  
terminus of a variety of enzymes involved in bacterial cell wall degradation.

>A7K8G4\_9PHYC

MFAISMSITPENKQSIADYVKRMLALAEKELNAVGDYKGLGPNRRVQFKTALGNALIKGDPVPTPDPEQSHDTKPPAGNV  
PTPGPSTGTRIPSSIVPQLATLGFSETDADTILSLISLPENSNTTEWWKNYNFASRLGDGRGWTVTLYGACSGTGDLVMILK  
DLQKINPHHKLVKYIPAMEKTEGEDVRGLENLGRDIKSLGDDKEWQAVWDIYIKLYWNFARNFSDKLINRPGAKLTSPLTR  
GFMVDTALNHGADLDSFGPILKGMNNDKDEATWFLDFCESRRKLLKRGFQDLDTSKTGDRCTLWANI FKSGNTSLTRPIK  
CYRGYWGNTIS

PRK09752 - adhesin domain (provisional)

>Q84608\_PBCV1

MSNKIEITDDNKMTIQNDFVSRMMKSIDQELVAMTNKYSFGFGPGRQTNCKKALAKALGETPVNPPVNPVTPPVVDTHIPSQV  
EAPLKKLGFNTTNADTILSLIALPENSTTQWWKNYNFASCLKDRGWTVTIYGACSGTGDLMLVLESLOKINPNHPLVKFIP  
AMRKTGKDDIRGLENLGVINGLDDKEWQAVWDIYVKLYWTF AADFSDKTGSAKNRPGPVMTSPLTRGFMVDVALNHGSN  
MESFSDILKRMKNREEKDEAKWFLDFCETRRLKLLKAGFQDLDTSKTGDRCTLWA

NIFKEGNVGLKRPKICYNGYWGKNIVIS

N-terminal domain of unknown function, shared with other chitosanases from *Chlorella*  
viruses

Figure S3. Cont.

>O12288\_9PHYC

MSNKIEITDDNKMTIQNDFVSRMMKSIDQELVAMTNKYSGFPGRQTNCKKALAKALGETPVNPPVNPVTPPVVDTHIPSQV  
 EAPLKKLGFNTTNADTILSLIALPENSTTQWWKNYNYASCLKDGRTVTVIYGACSGTGDLLMVLESLOKINPNHPLVKFIP  
 AMRKTGDDIRGLENLGKVINGLGDDKEWQTAVWDIYVKLYWTFAADFSDKTGSAKNRPGPVMTSPLTRGFMVDVALNHGSN  
 MESFSDILKRMKNKDEKDEAKWFLDFCETRRLKLLKSGFQQLDTSKTGDRAILWSELFKTGNVGLKRPIKCYNGYWGKNIVIS  
 N-terminal domain of unknown function, shared with other chitosanases from *Chlorella*  
 viruses

>A7RBE5\_PBCVA

MFMTSRIEITEDNKSKIQNDFVSKMMEDIEQELDAMTKKYSGFPGRQTNFKRALSRALEETLVKPPIVPPVDSHIPSHVEA  
 SLKQFGFSIENADMILSLISLPENSTIEWWKNYNYAERLHDGRGWTVTLYGACSGTGDLLMILEALQKINSKHPLVKFIPAM  
 RKTGDDIRGLENLGKVINVLGDDKEWQEAVWEIYIKLYWTFATDFADKKNRPGAVLTSPLTHGFMIDVALNHGANME  
 SFEPILKNMKNREEKDEAKWFLDFCEARRKLLKSGFQQLDTSKTGDRC TLWANI FKSGNVGLKRPIQCFDGYWGKNFIIA  
 N-terminal domain of unknown function, shared with other chitosanases from *Chlorella*  
 viruses

>KUTG\_00281

SDVPNGPTATSKAPRPGGGLTADQRRRADQLISIFENGTATVQYGYAEDLHDGRGVTAGRAGYTTNDGDALRVIQAYTDLAP  
 GNLARFAPALRQLADTGSGLPEADYIAAWRQAADDPAFRRVQDDQVEQNYFTPAMAAADRLGLITPLARAELYDAAIQHG  
 HGADPDGLPALIDRATARAGKVDEAAWLTAFLDVRADDLRNPANADTKEEWSKSTDRVECFRRIAATGDYTLAGPLTVTAYG  
 VTYSLA

**Figure S3:** Identification of non-catalytic modules in GH46 proteins. FASTA-formatted sequences are shown without the predicted *N*-terminal signal peptides.

© 2015 by the authors; licensee MDPI, Basel, Switzerland. This article is an open access article distributed under the terms and conditions of the Creative Commons Attribution license (<http://creativecommons.org/licenses/by/4.0/>).
